# Supplementary material for: Highly varied reaction cavities within a single molecular crystal
Source: Royal Society of Chemistry journal article supplement (doi:10.1039/d3ce00714f), 2023-01-01
Supplement: d3ce00714f1.pdf [file d3ce00714f1.pdf]

# Highly Varied Reaction Cavities within a Single Molecular Crystal

Michael R. Carr<sup>1</sup>, Matthew Kochert<sup>1</sup>, Wathsala L.I. Waduge<sup>2</sup>, Gregory J. Deye<sup>1</sup>, Kenneth W. Olsen<sup>1</sup> and  
Jacob W. Ciszek<sup>\*1</sup>

<sup>1</sup>Department of Chemistry and Biochemistry, Loyola University Chicago,  
Chicago, Illinois, 60660, United States

<sup>2</sup>Department of Chemistry and Biochemistry, Illinois Wesleyan University,  
Bloomington, Illinois, 61701, United States

\* Corresponding author: E-mail address: [jciszek@luc.edu](mailto:jciszek@luc.edu) (Jacob W. Ciszek)

## *N*-methylmaleimide Reacted Crystals

Left: Image of crystal with tilted stage used for indexing. The crystal is  $X^\circ$  off of parallel to the frame.

Right: Image of crystal when EDS was taken and no stage tilt.

( $1\bar{1}0$ )

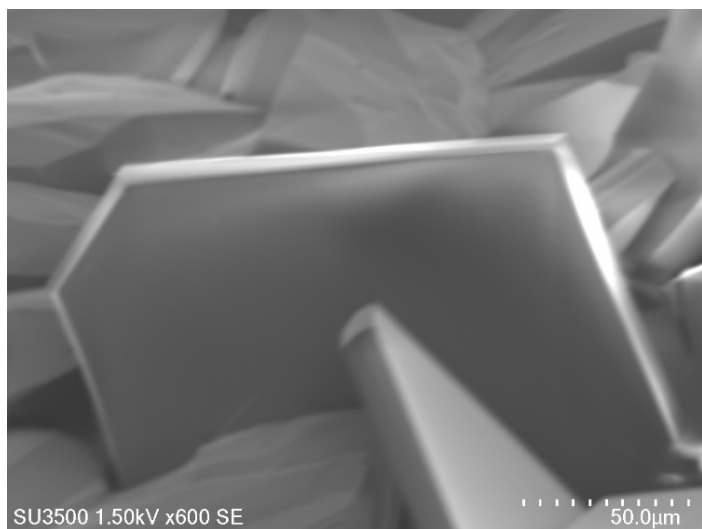

Tilt: 10°

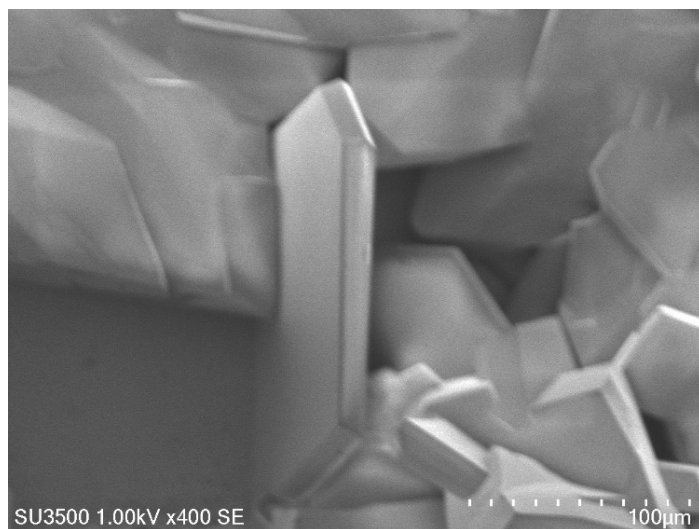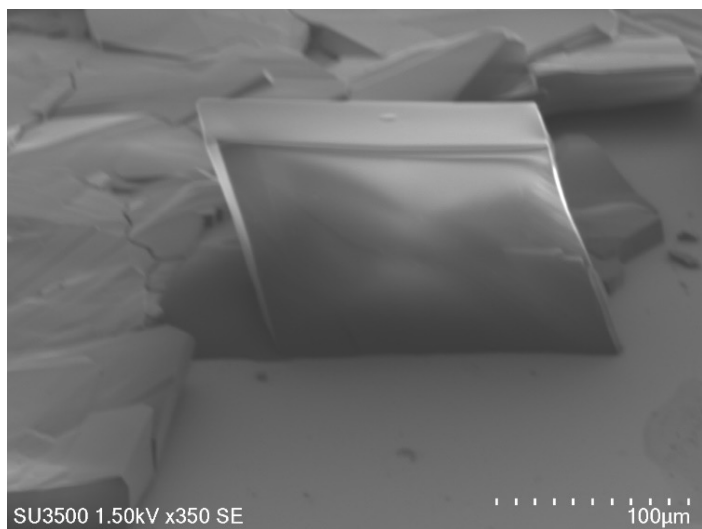

Tilt: 15°

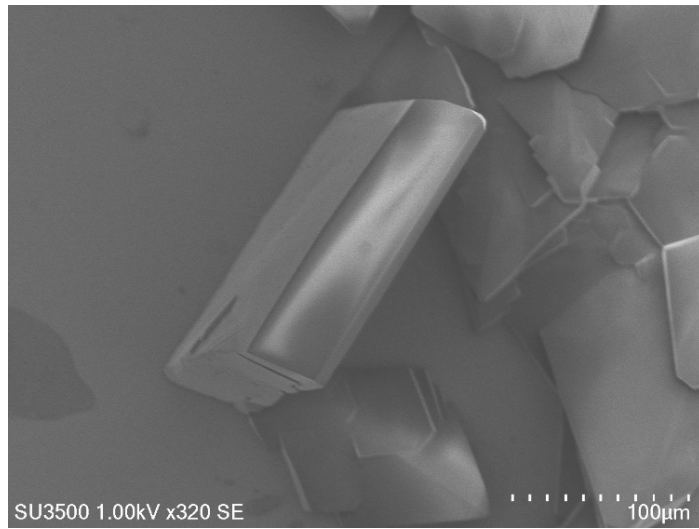

( $111$ )

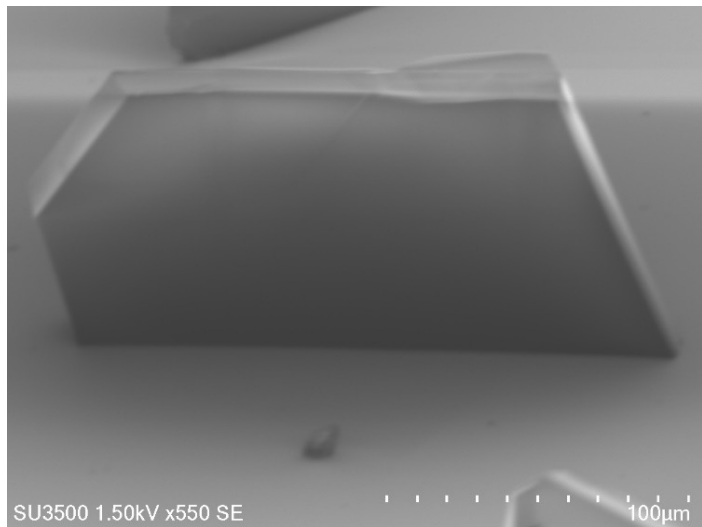

Tilt: 30°

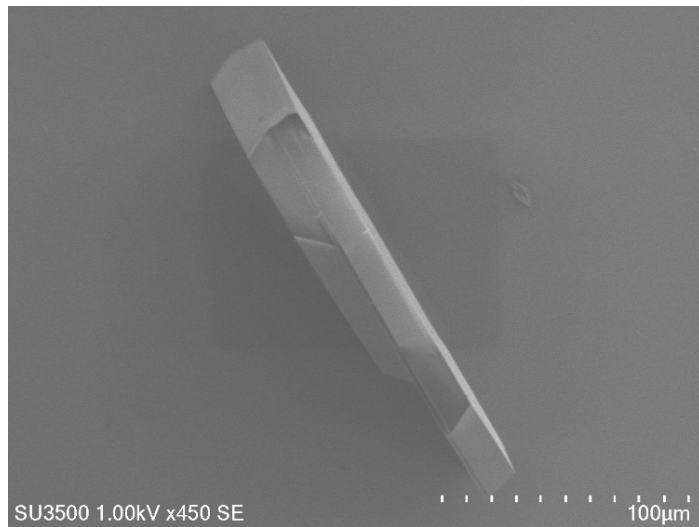

(110)

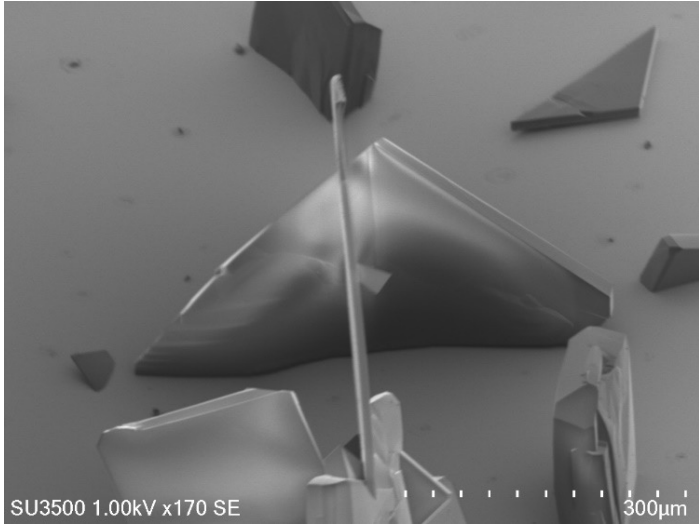

Tilt: 10°

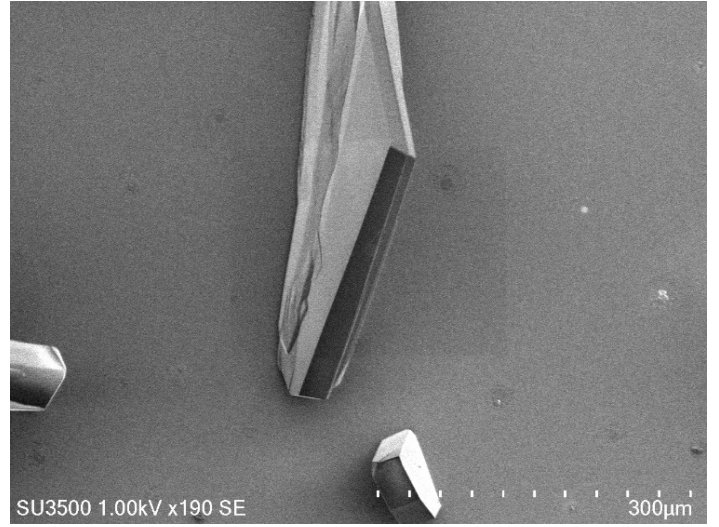

## Maleic Anhydride Reacted Crystals

Left: Image of crystal with tilted stage used for indexing. The crystal is  $X^\circ$  off of parallel to the frame.

Right: Image of crystal when EDS was taken and no stage tilt.

(001)

0h

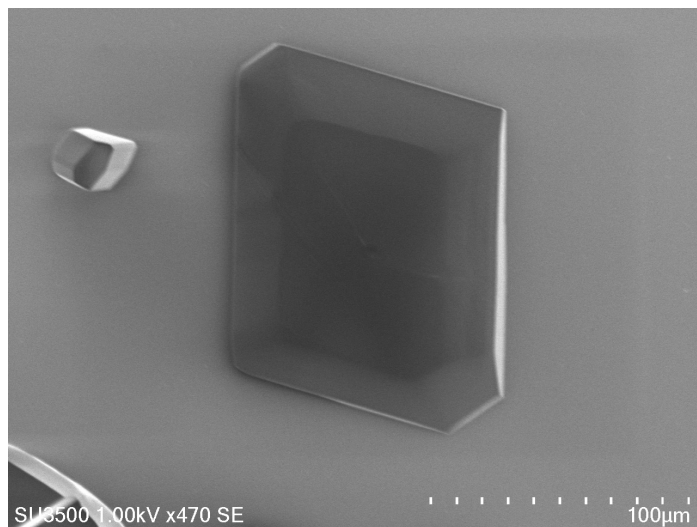

O%:  $1.32 \pm 0.46$

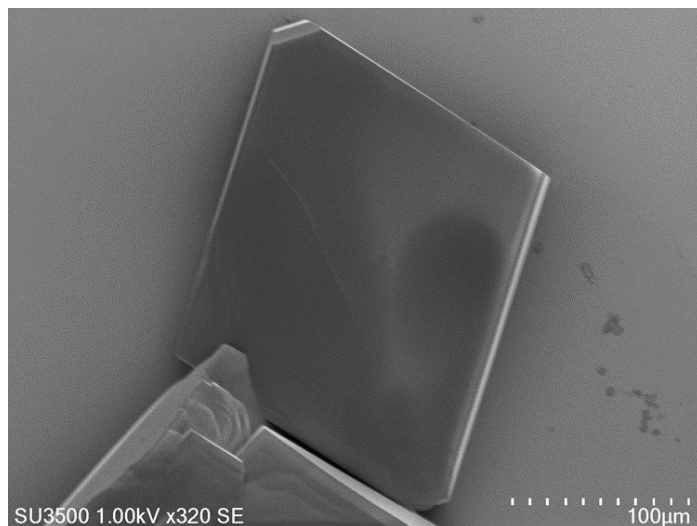

O%:  $0.68 \pm 0.45$

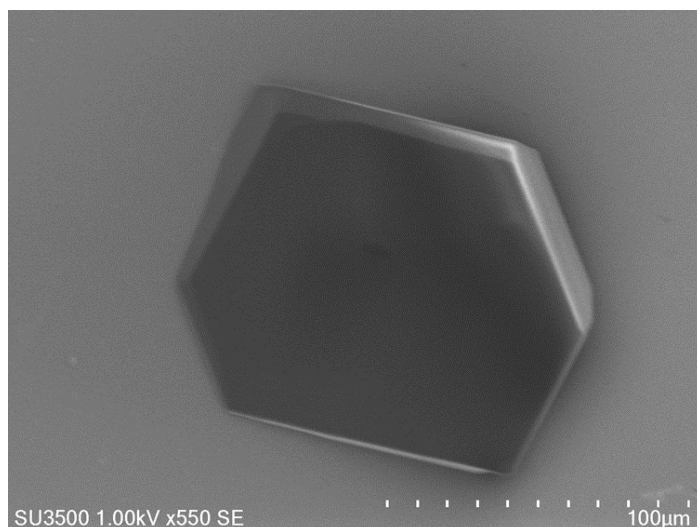

O%:  $0.66 \pm 0.36$

4h

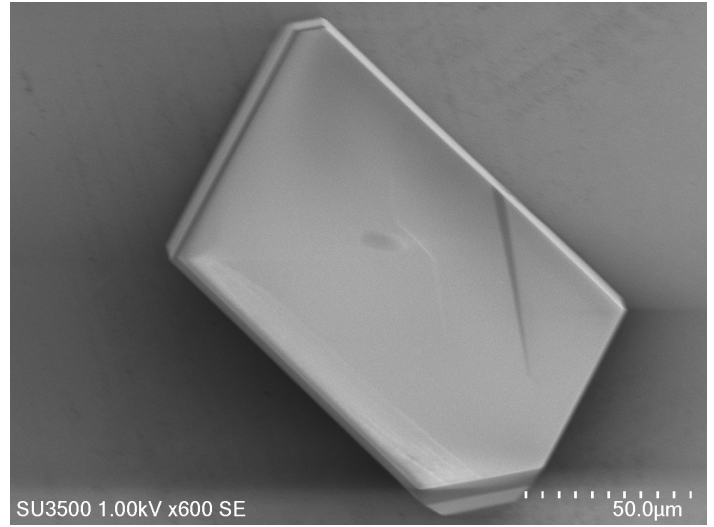

O%:  $0.73 \pm 0.47$

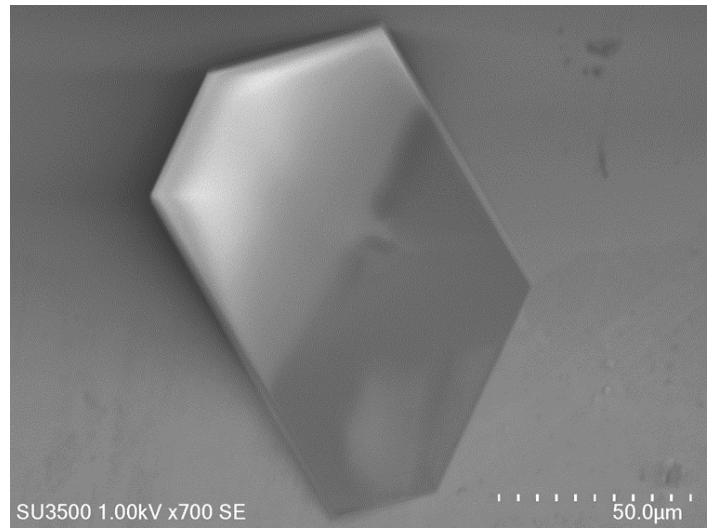

O%:  $0.48 \pm 0.42$

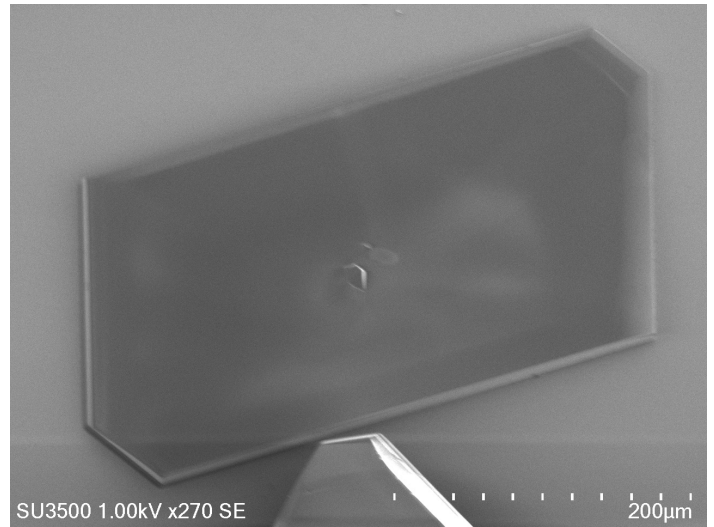

O%:  $0.38 \pm 0.34$

4h

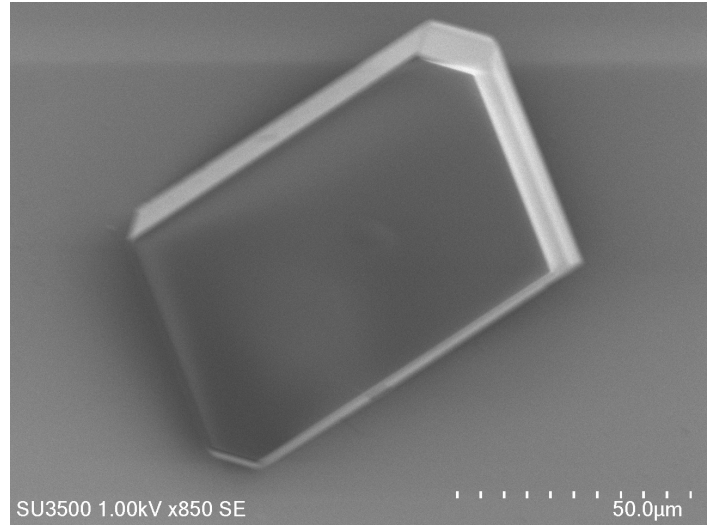

O%:  $0.68 \pm 0.50$

8h

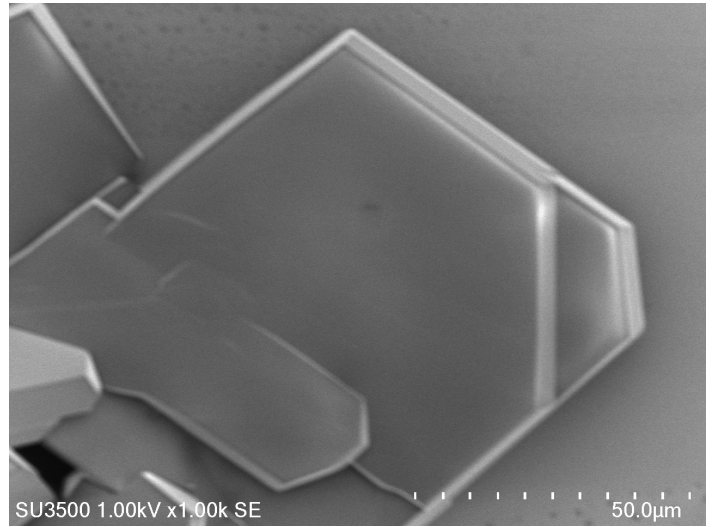

O%:  $1.24 \pm 0.45$

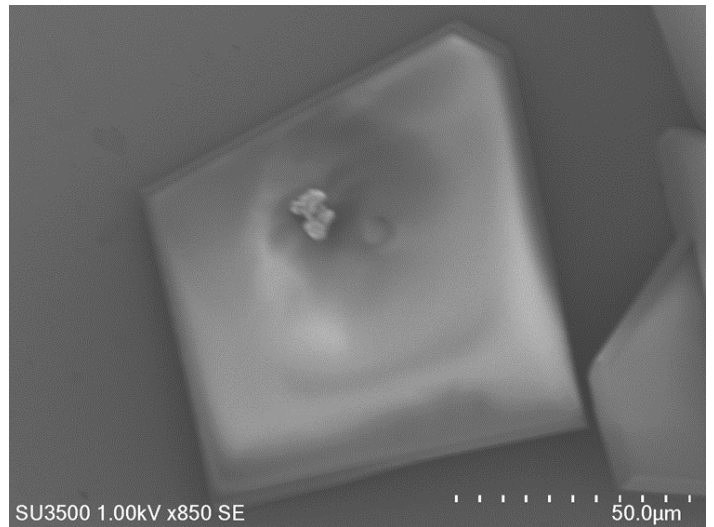

O%:  $0.63 \pm 0.31$

8h

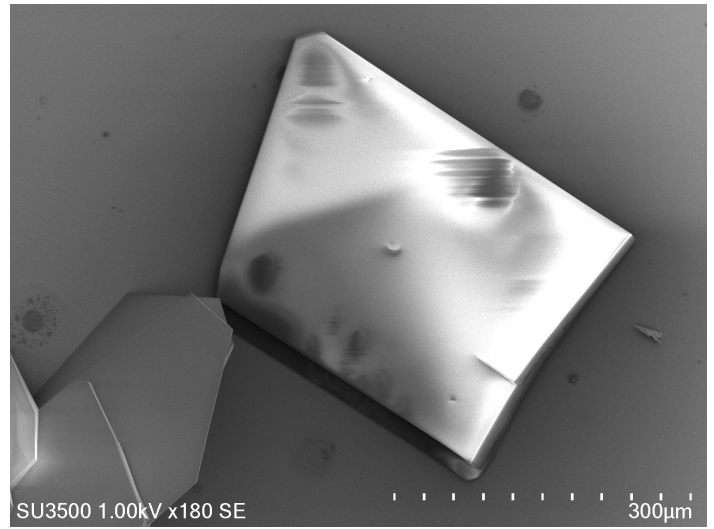

O%:  $1.65 \pm 0.54$

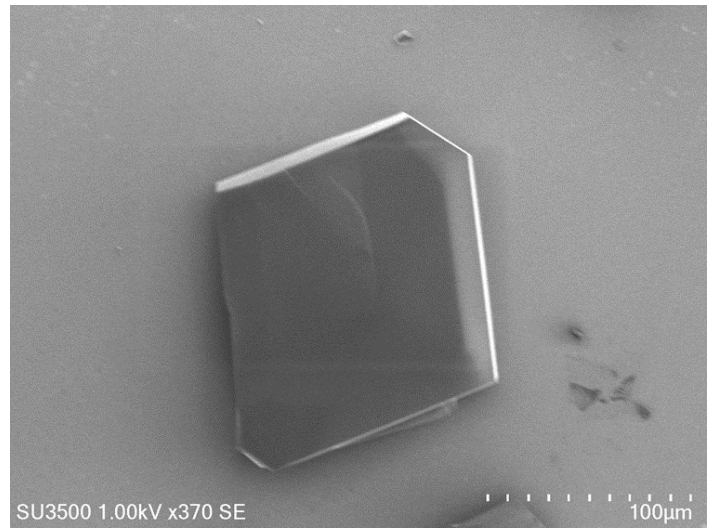

O%:  $1.50 \pm 0.46$

12h

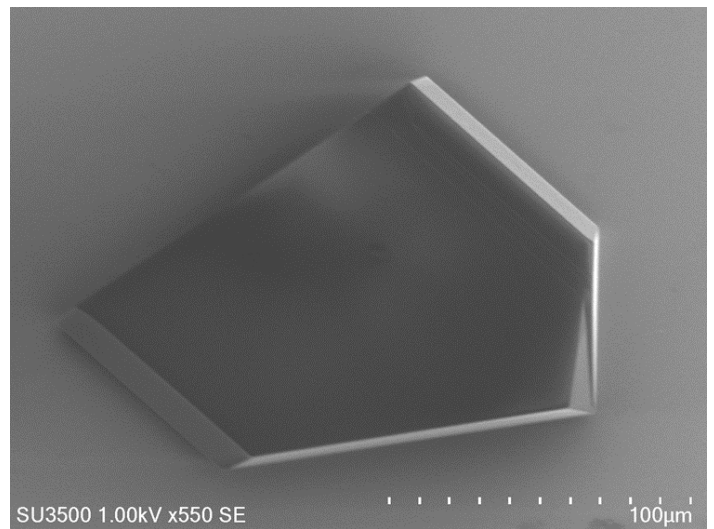

O%:  $1.88 \pm 0.62$

12h

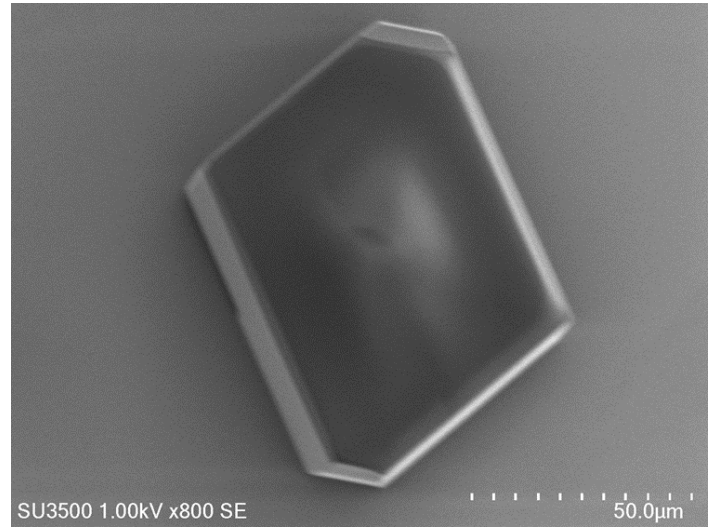

O%:  $1.83 \pm 0.66$

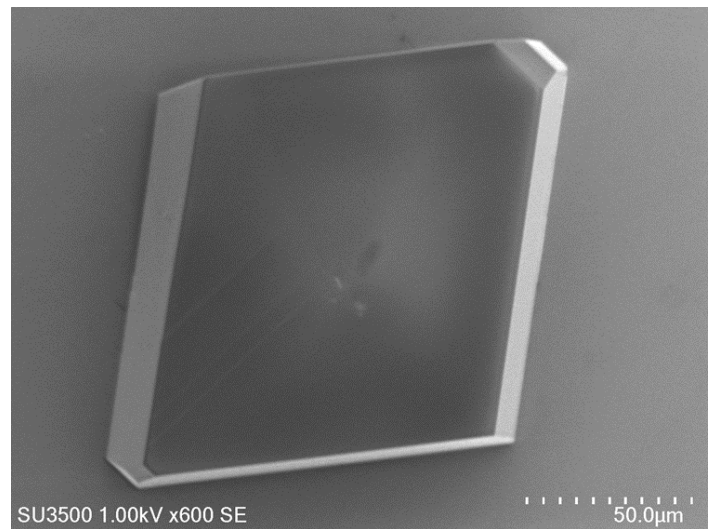

O%:  $0.91 \pm 0.46$

16h

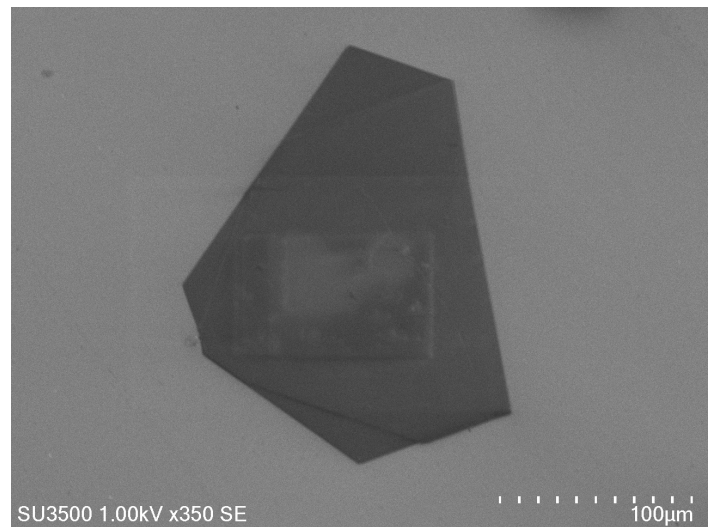

O%:  $0.90 \pm 0.34$



16h

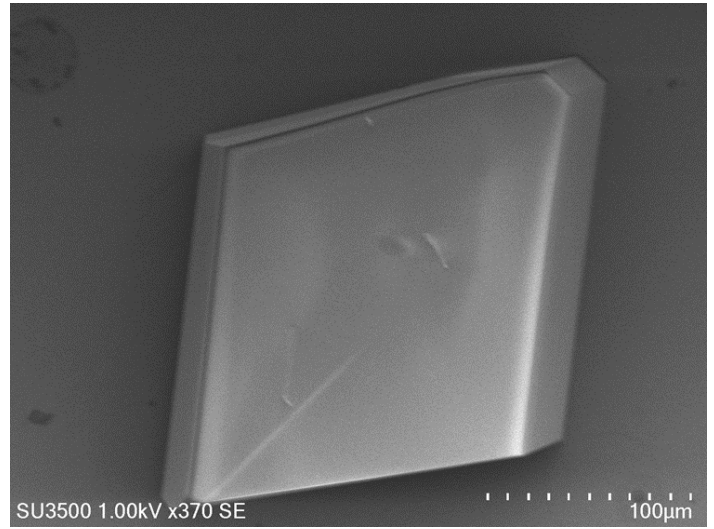

O%:  $1.87 \pm 0.74$

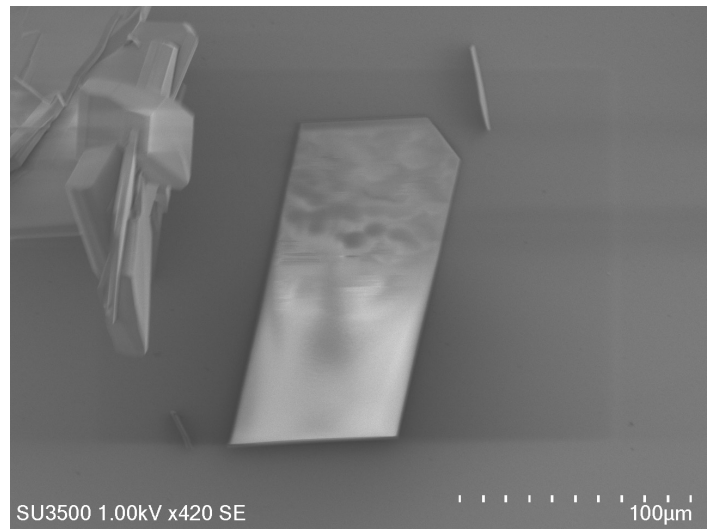

O%:  $2.90 \pm 0.62$

(100)

0h

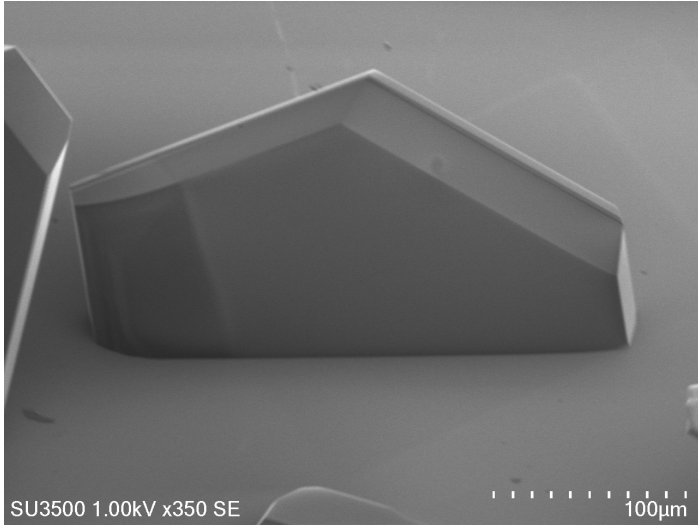

Tilt: 30°

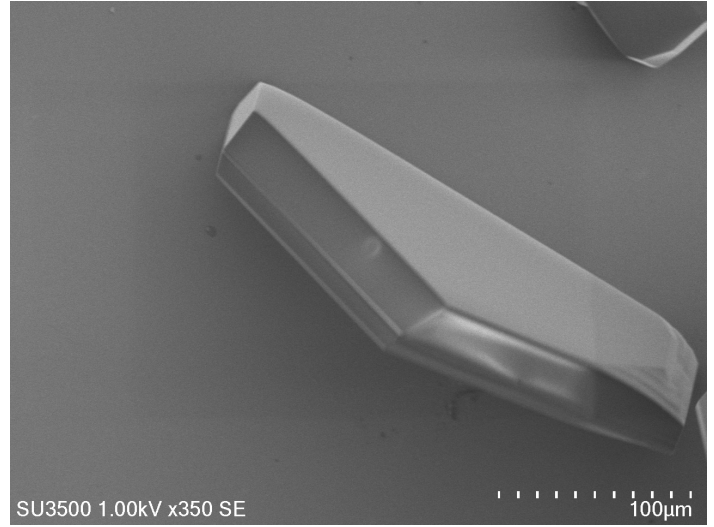

O%:  $1.27 \pm 0.53$

4h

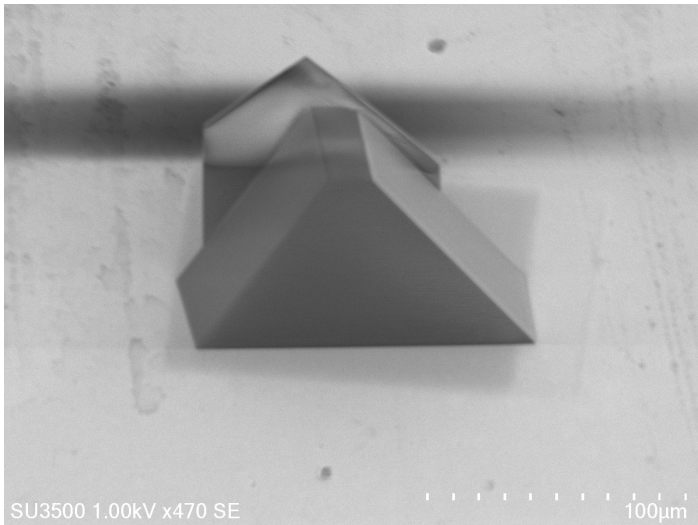

Tilt: 30°

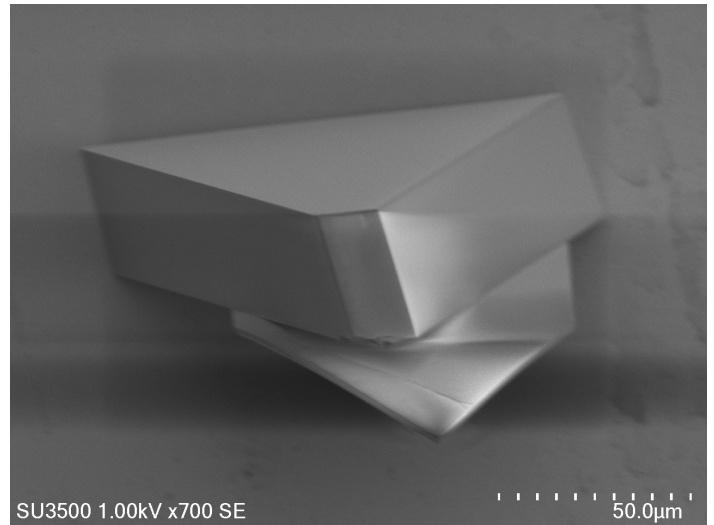

O%:  $1.90 \pm 1.22$

12h

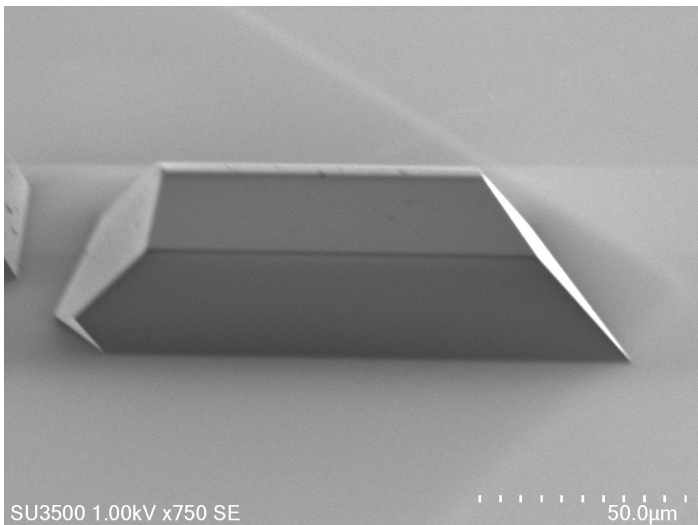

Tilt: 40°

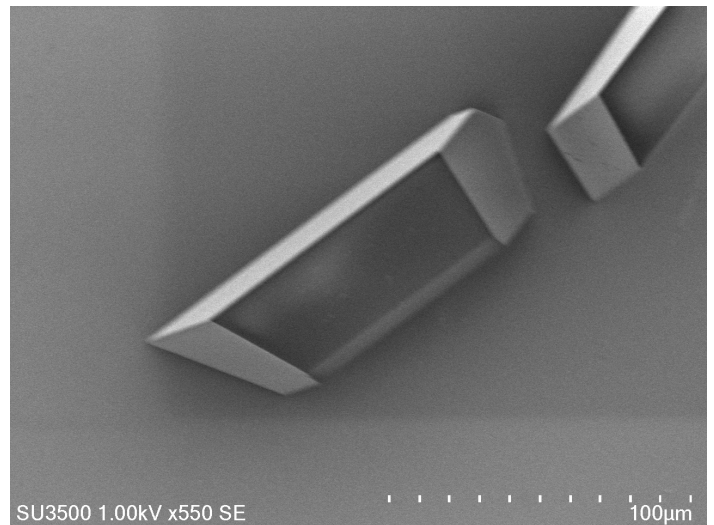

O%:  $1.28 \pm 0.85$

12h

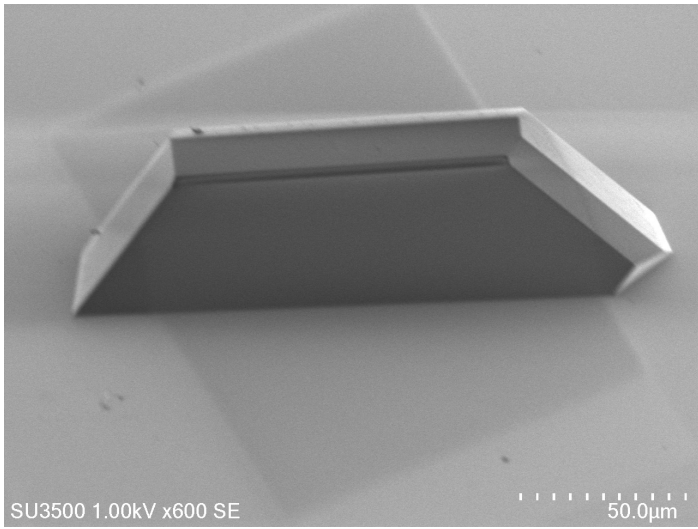

Tilt: 40°

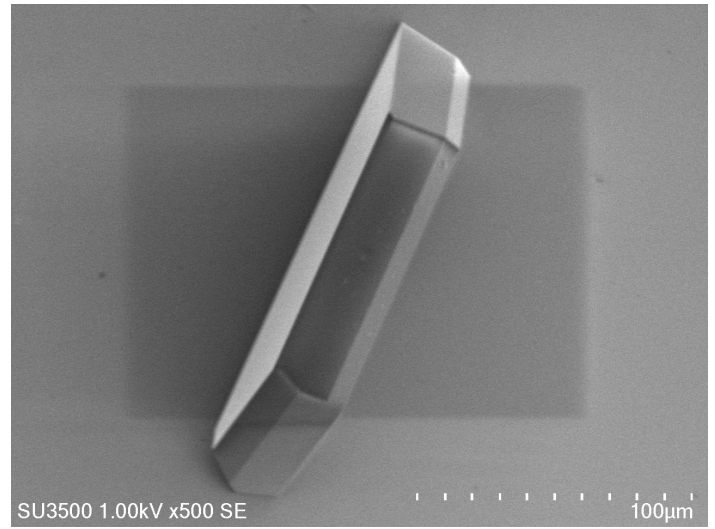

O%:  $1.97 \pm 0.54$

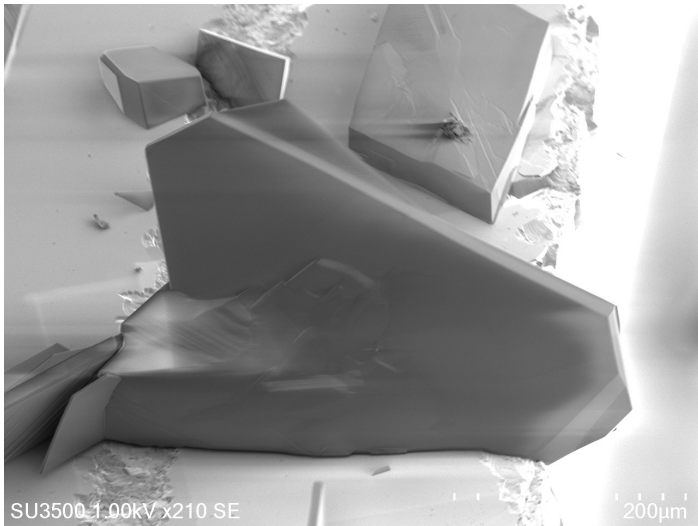

Tilt: 30°

16h

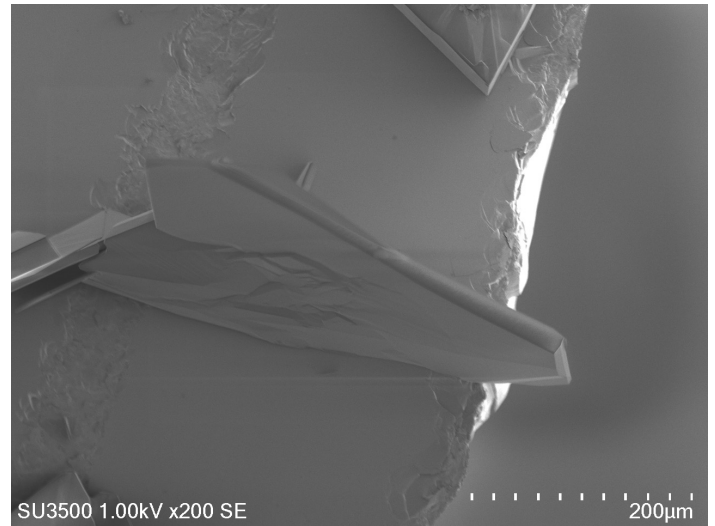

O%:  $4.18 \pm 1.08$

(110)

0h

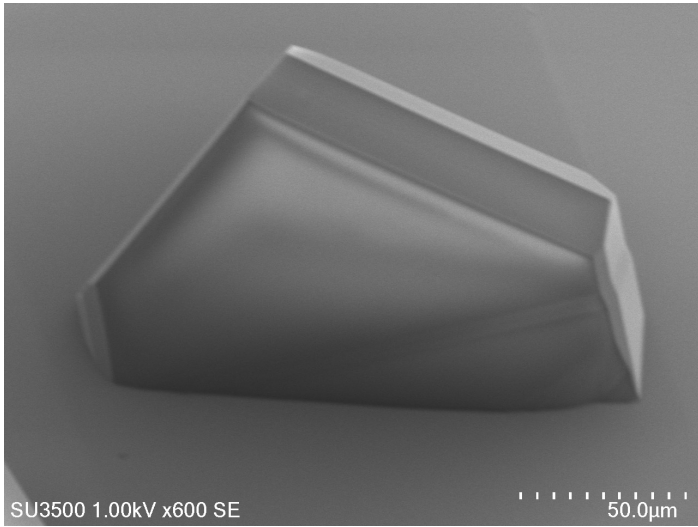

Tilt: 30°

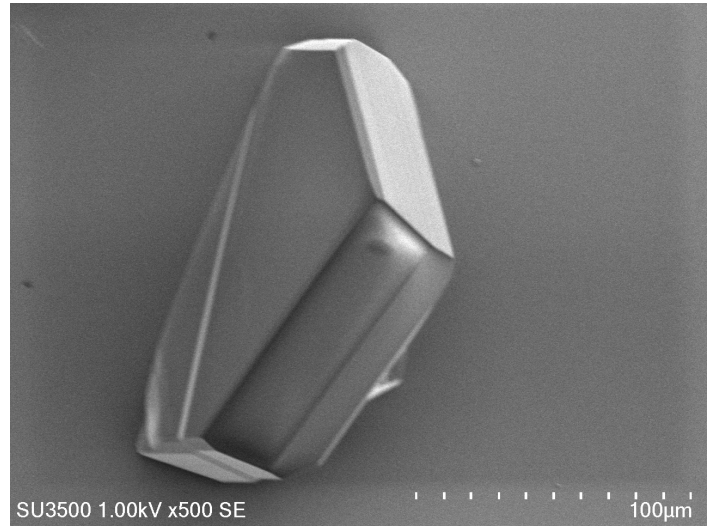

O%:  $1.75 \pm 0.59$

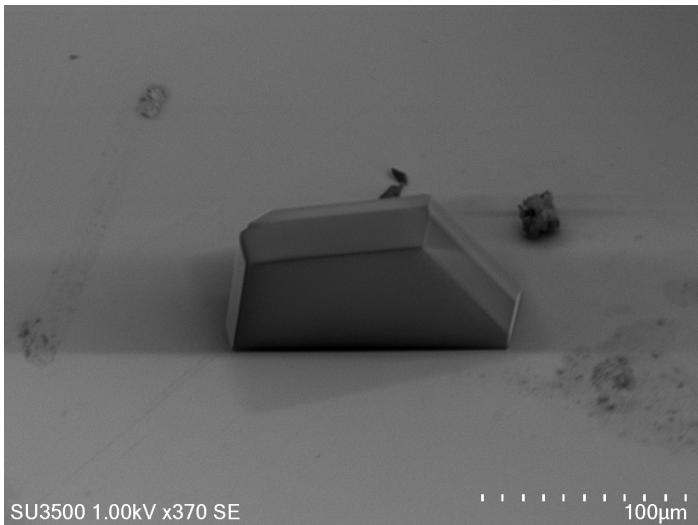

Tilt: 30°

4h

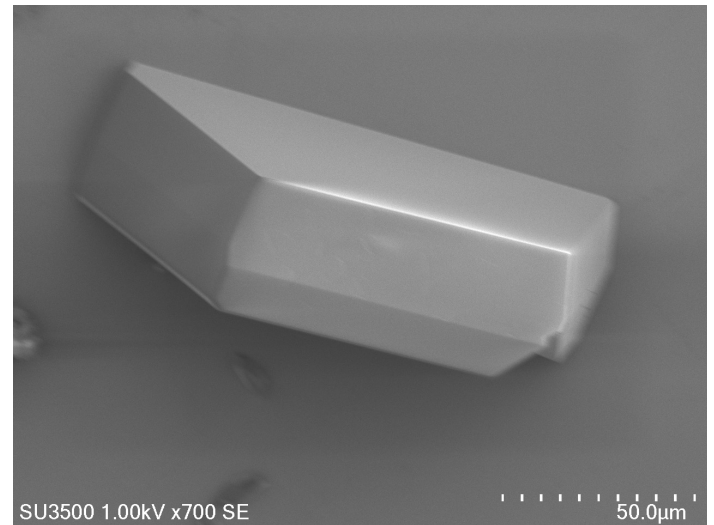

O%:  $1.48 \pm 0.61$

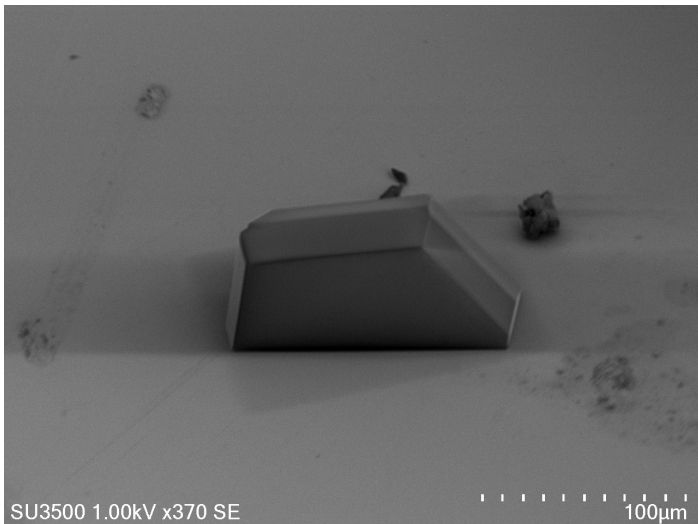

Tilt: 20°

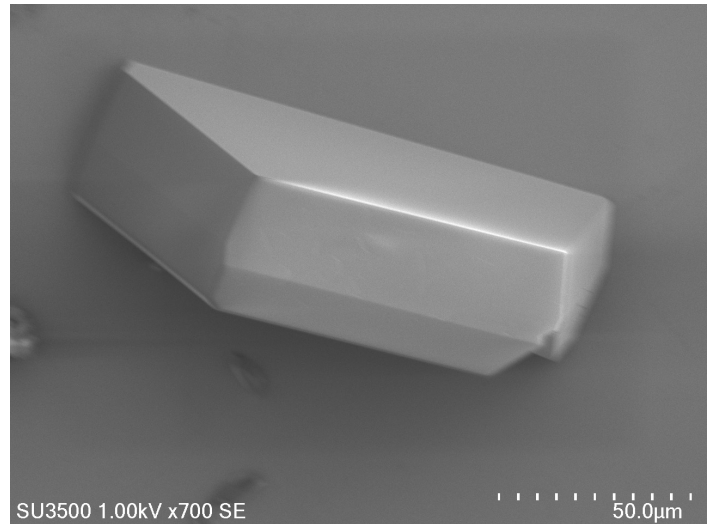

O%:  $1.69 \pm 0.47$

4h

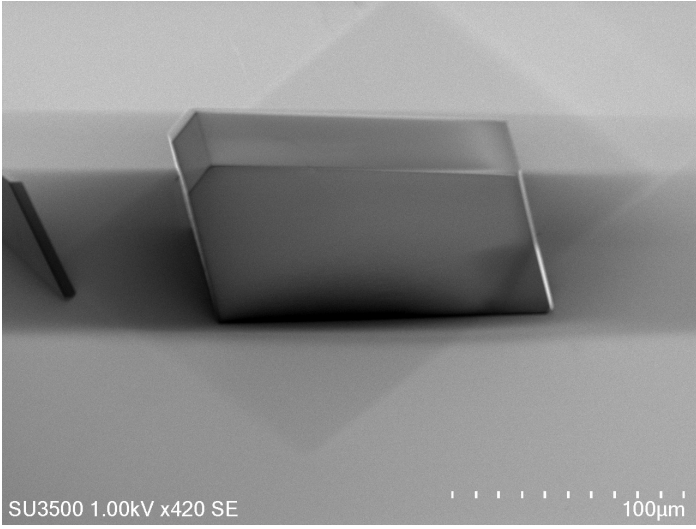

Tilt: 30°

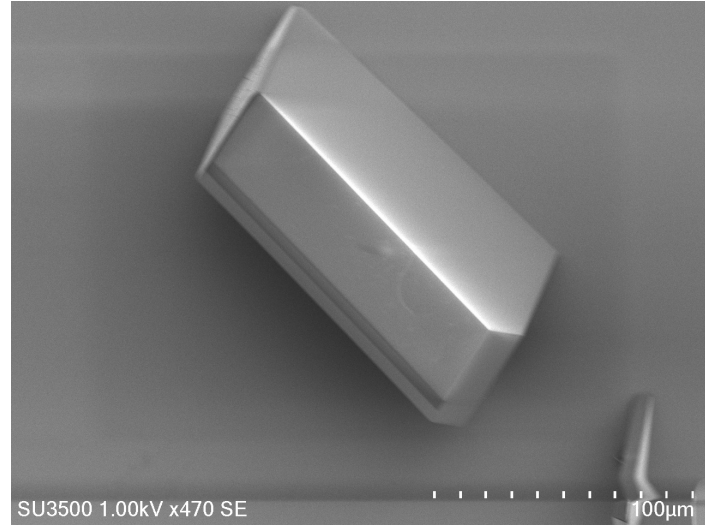

O%:  $1.84 \pm 0.60$

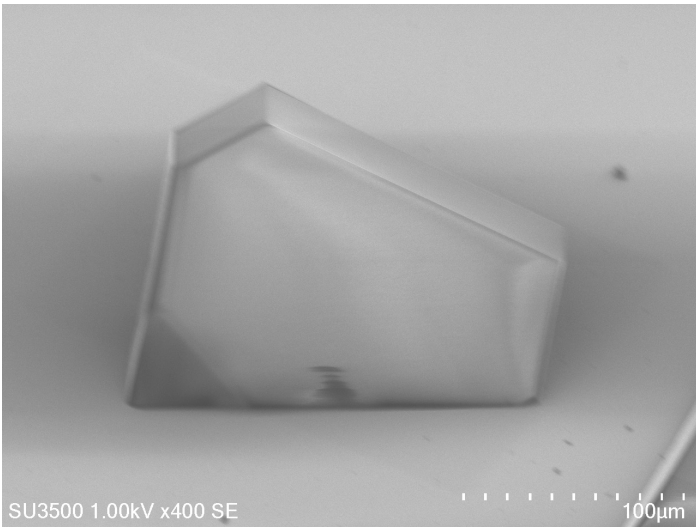

Tilt: 10°

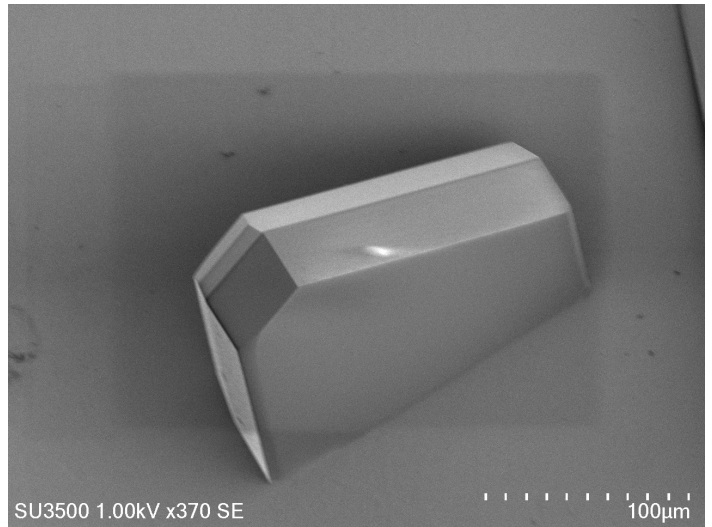

O%:  $2.10 \pm 0.53$

8h

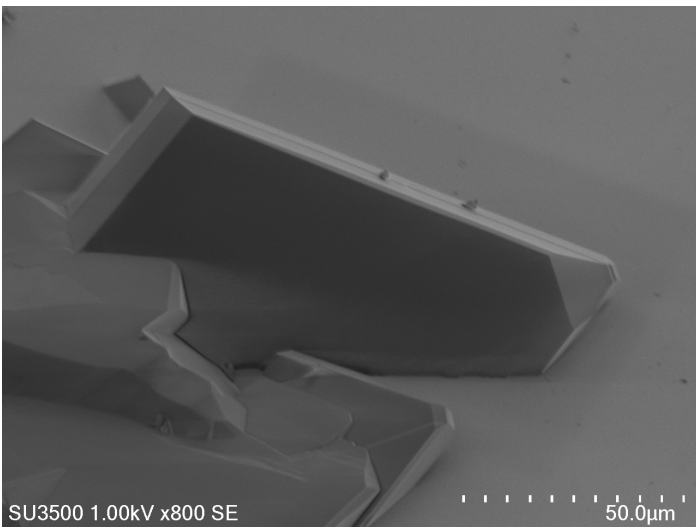

Tilt: 30°

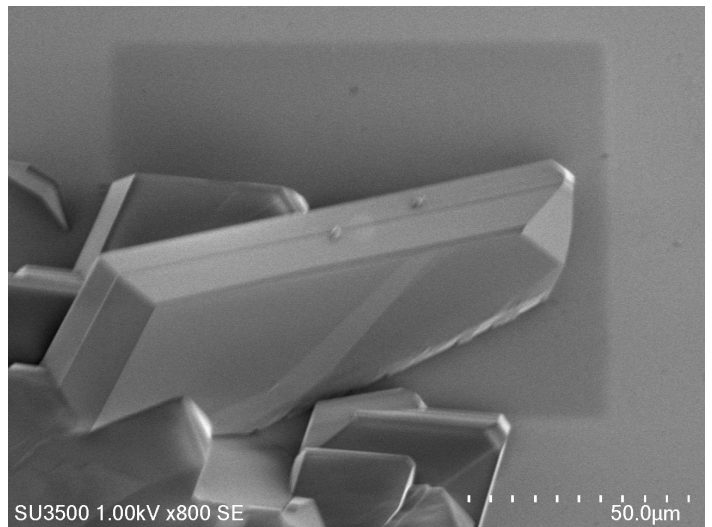

O%:  $3.51 \pm 0.78$

8h

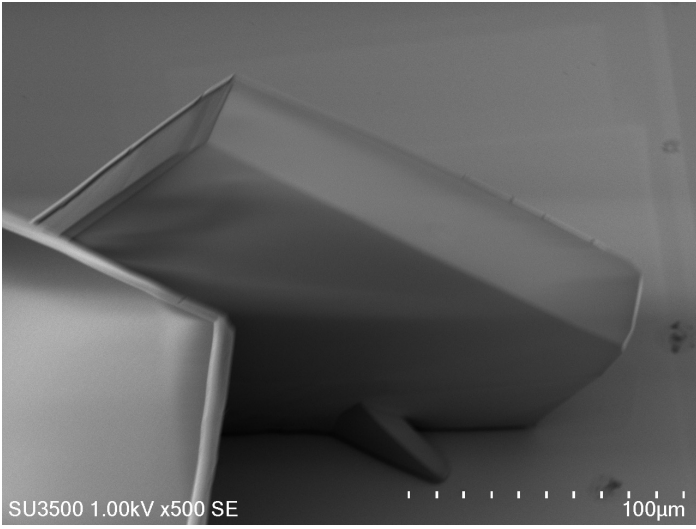

Tilt: 40°

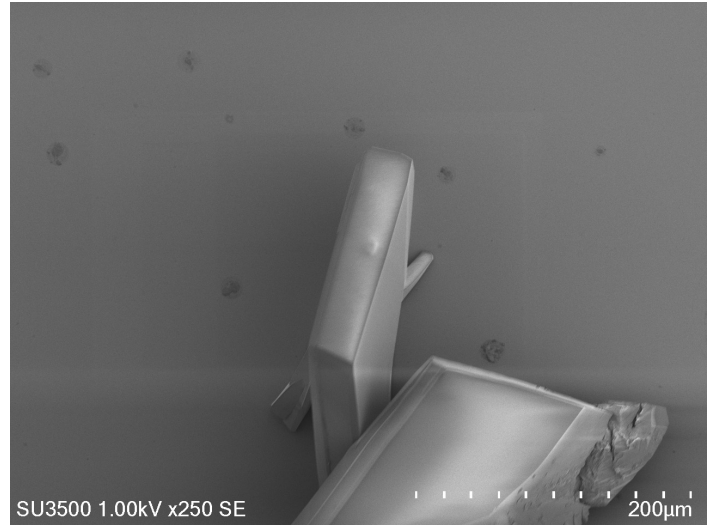

O%:  $3.95 \pm 0.93$

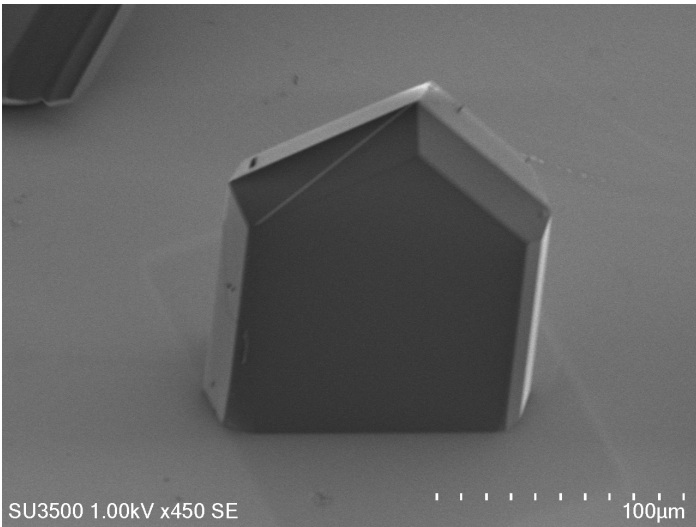

Tilt: 40°

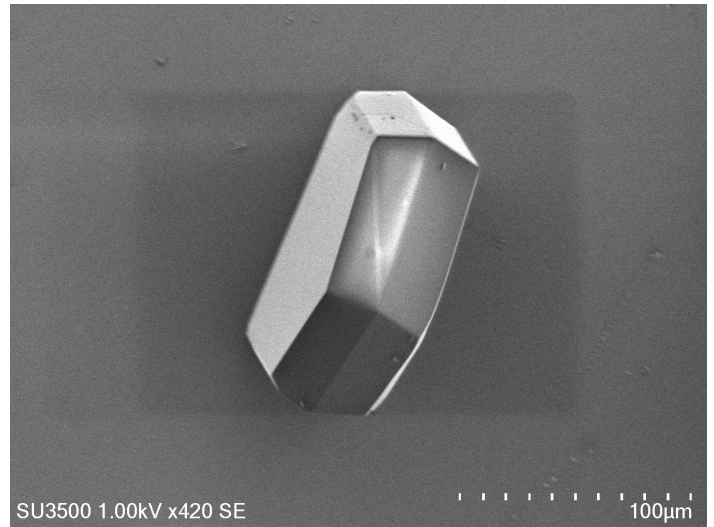

O%:  $4.18 \pm 1.11$

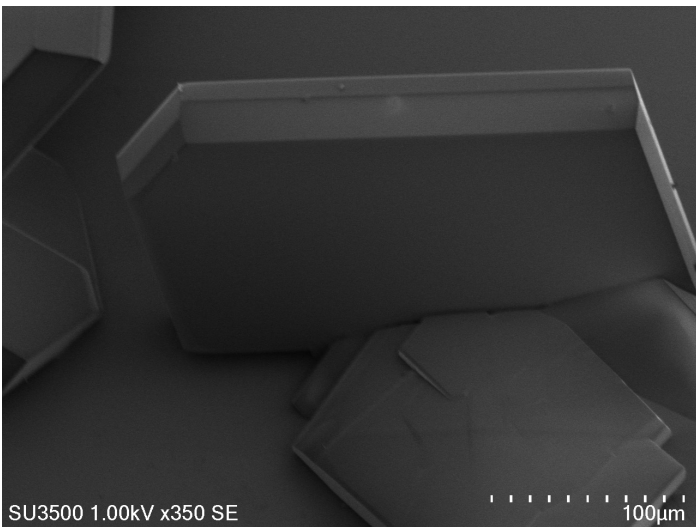

Tilt: 50°

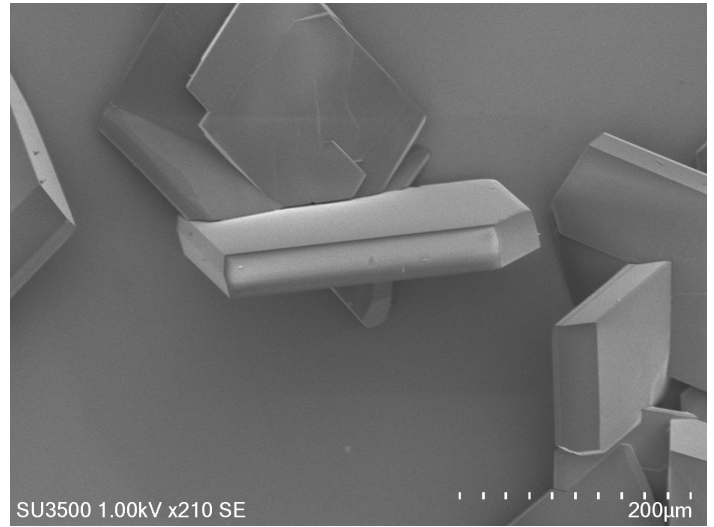

O%:  $4.14 \pm 1.29$

12h

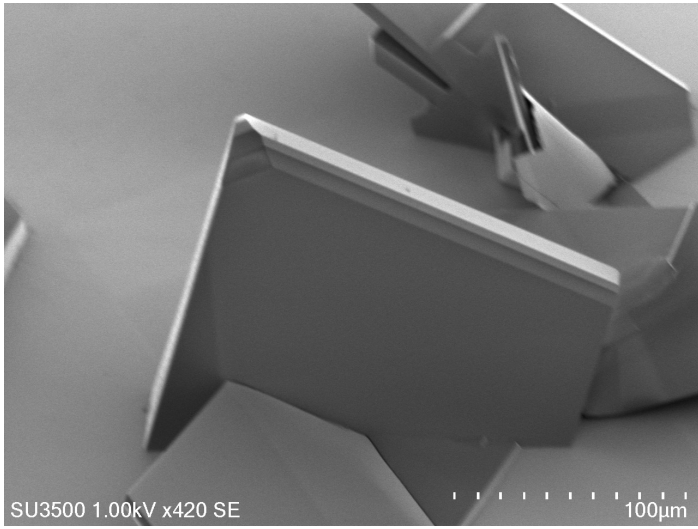

Tilt: 40°

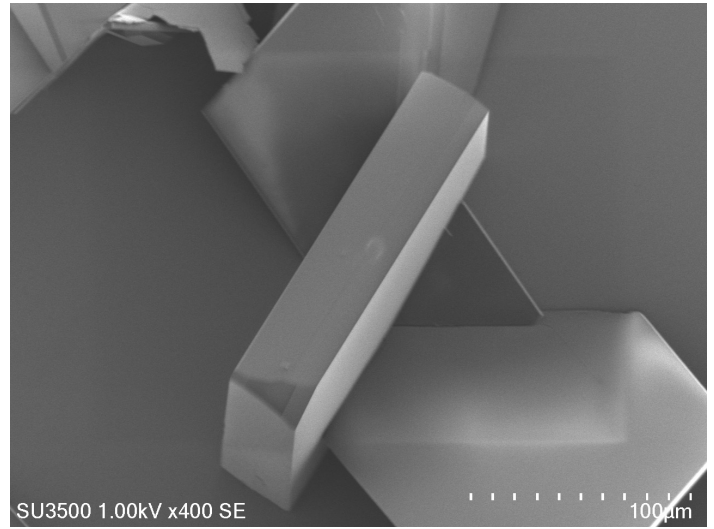

O%:  $3.17 \pm 0.72$

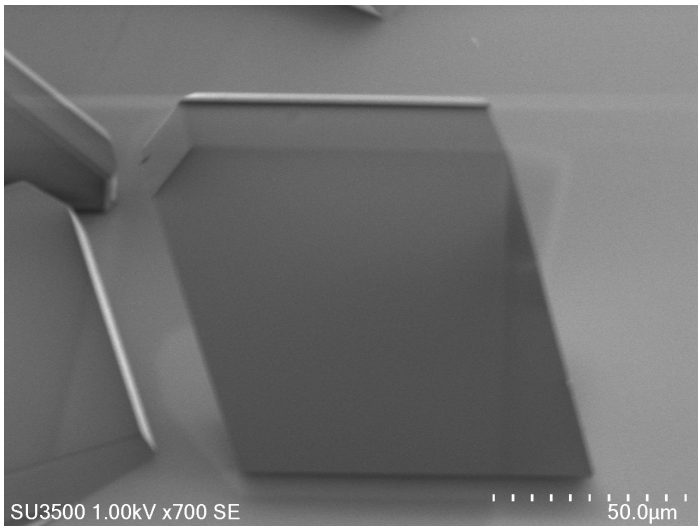

Tilt: 30°

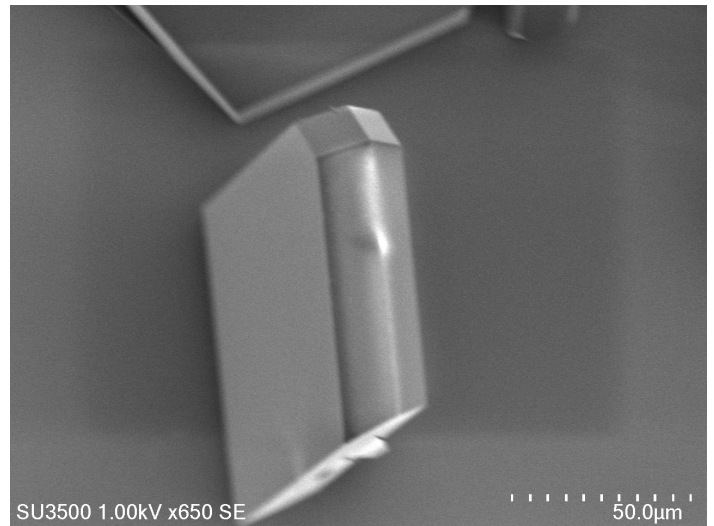

O%:  $1.97 \pm 0.90$

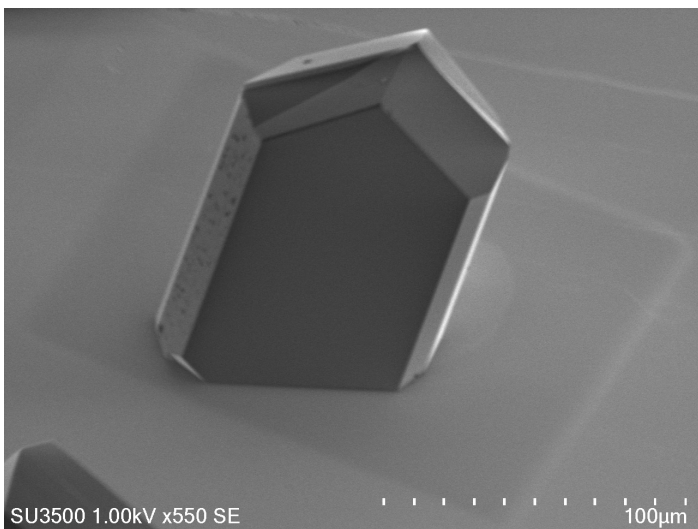

Tilt: 40°

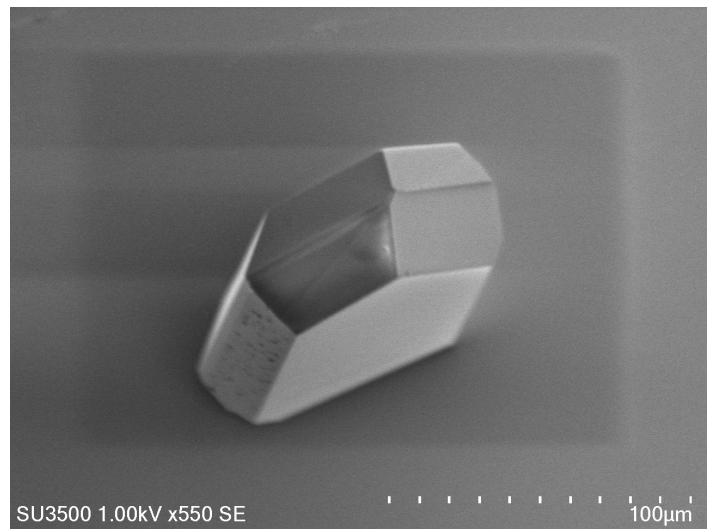

O%:  $3.69 \pm 1.12$

16h

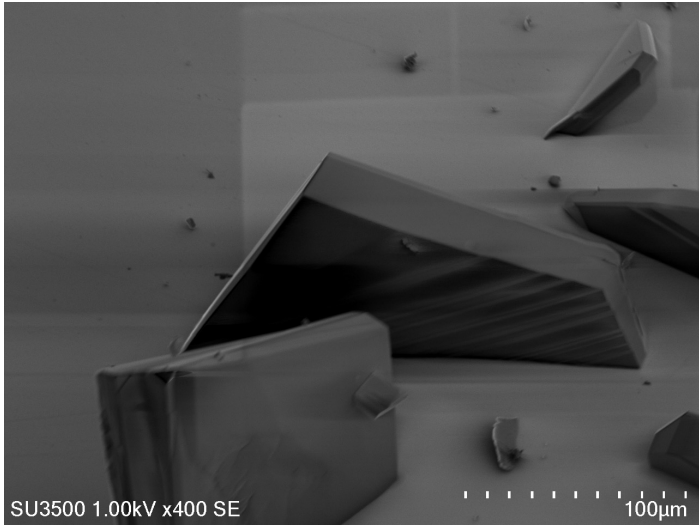

Tilt: 30°

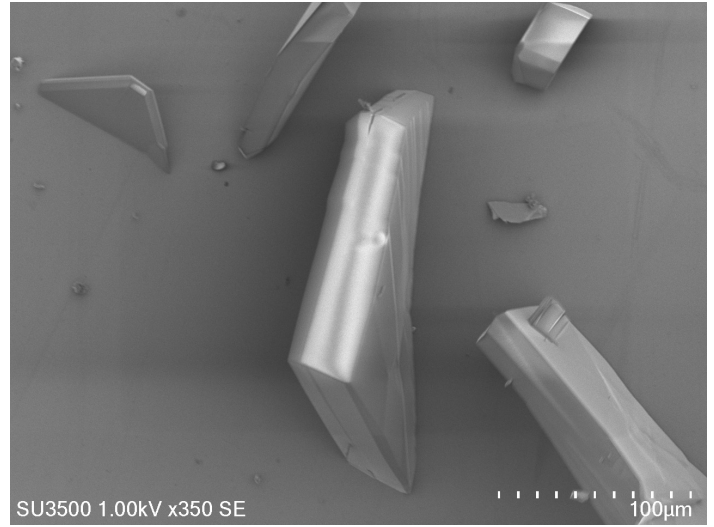

O%:  $3.93 \pm 1.01$

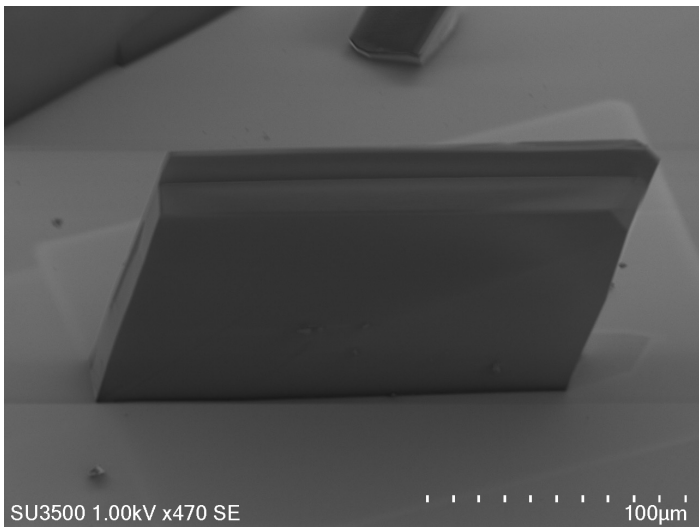

Tilt: 40°

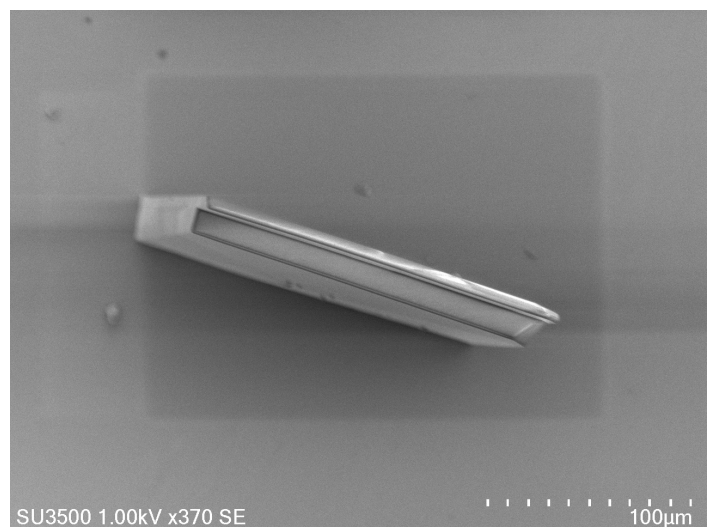

O%:  $3.88 \pm 1.90$

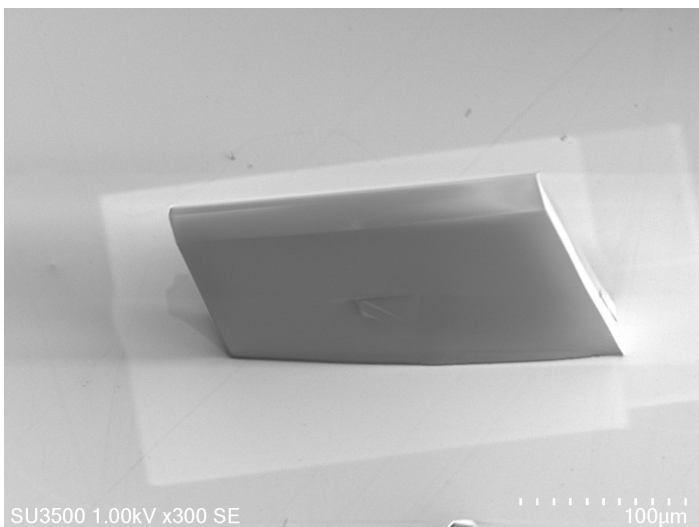

Tilt: 40°

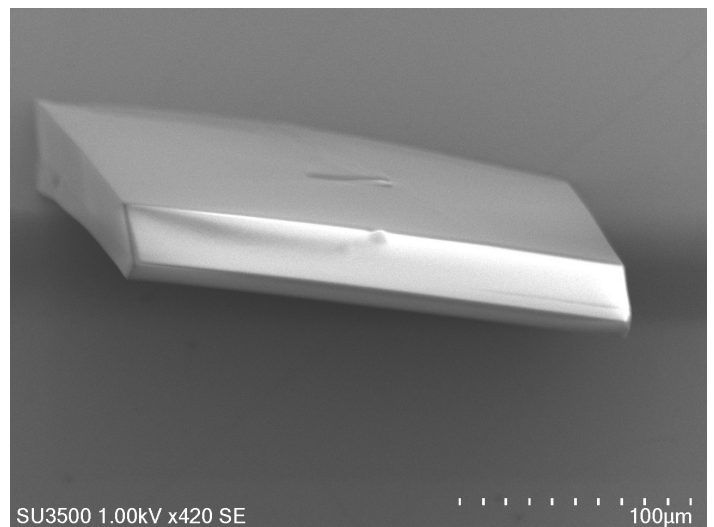

O%:  $3.29 \pm 1.01$



16h

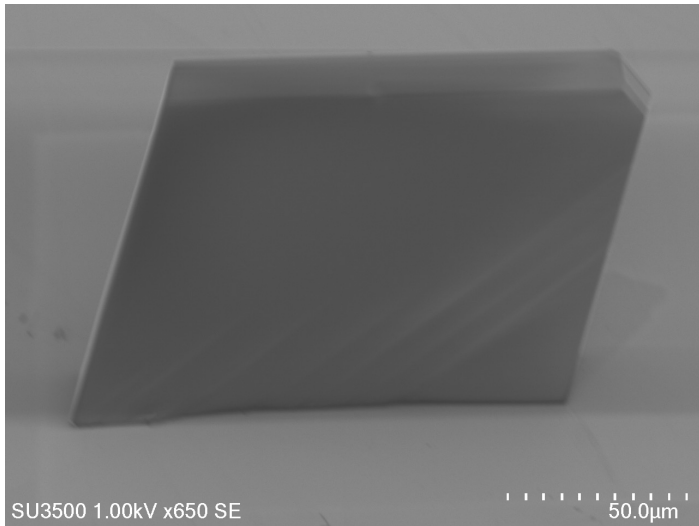

Tilt: 30°

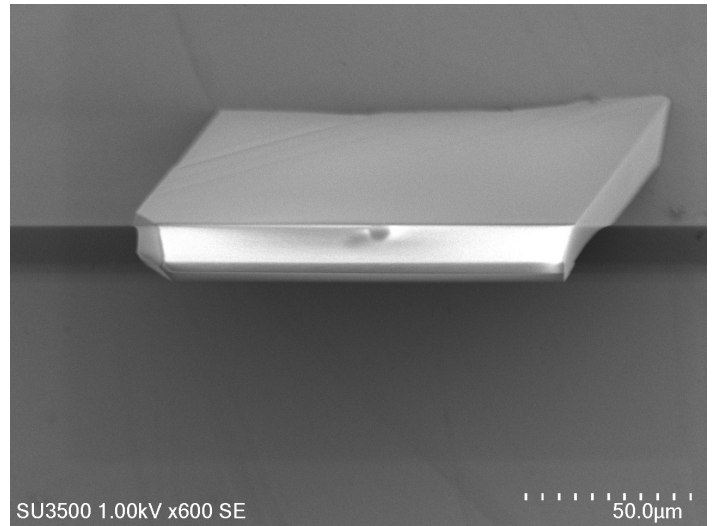

O%:  $2.97 \pm 0.99$

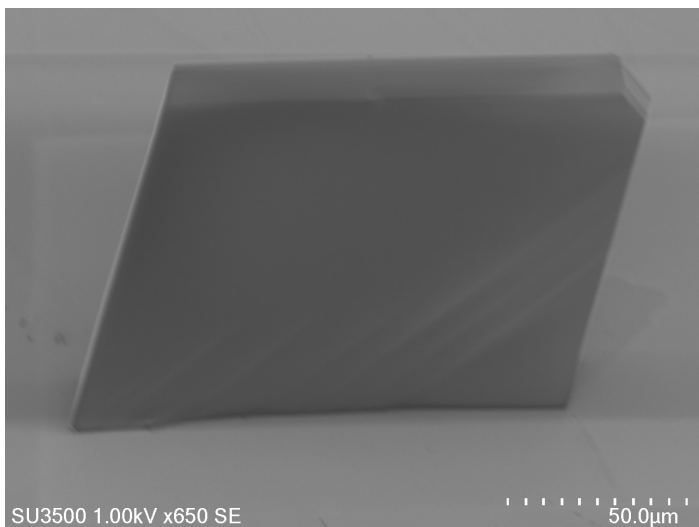

Tilt: 40°

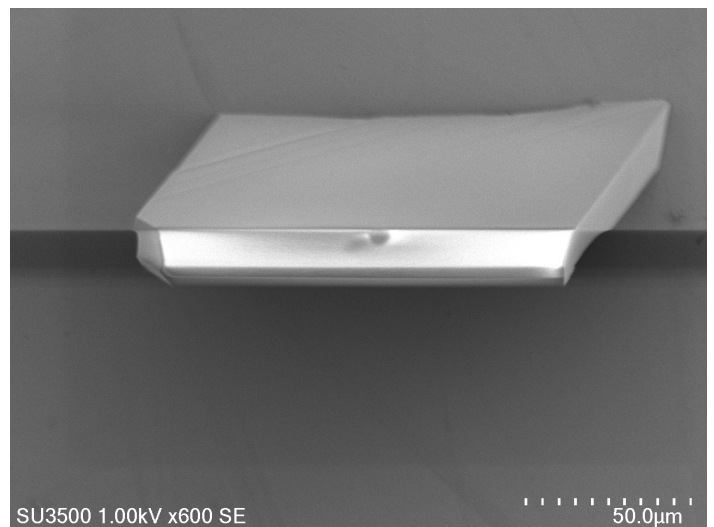

O%:  $2.51 \pm 0.85$

(110)

0h

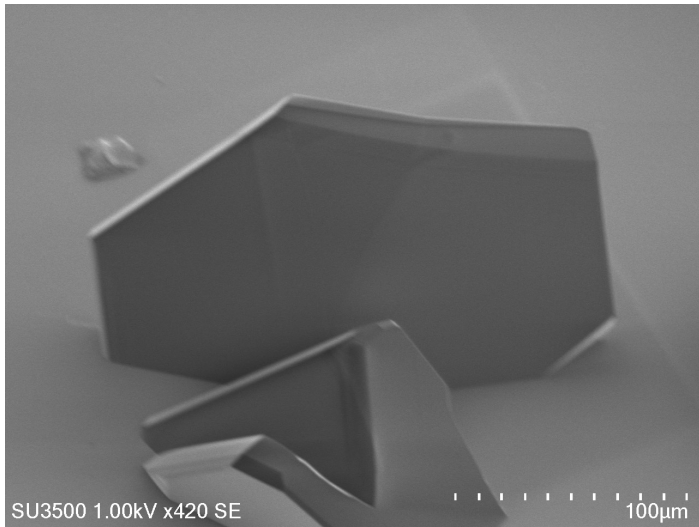

Tilt: 40°

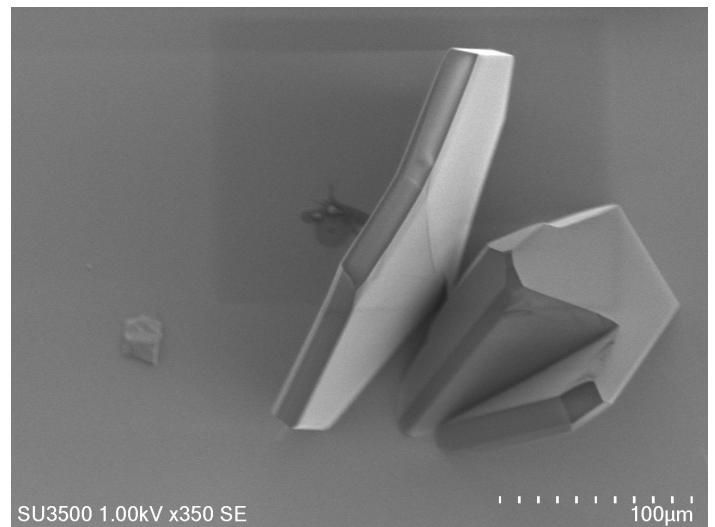

O%:  $1.31 \pm 0.60$

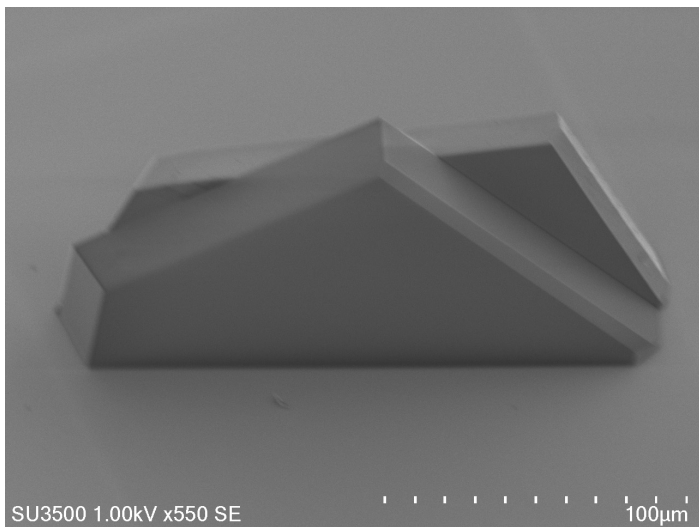

Tilt: 40°

4h

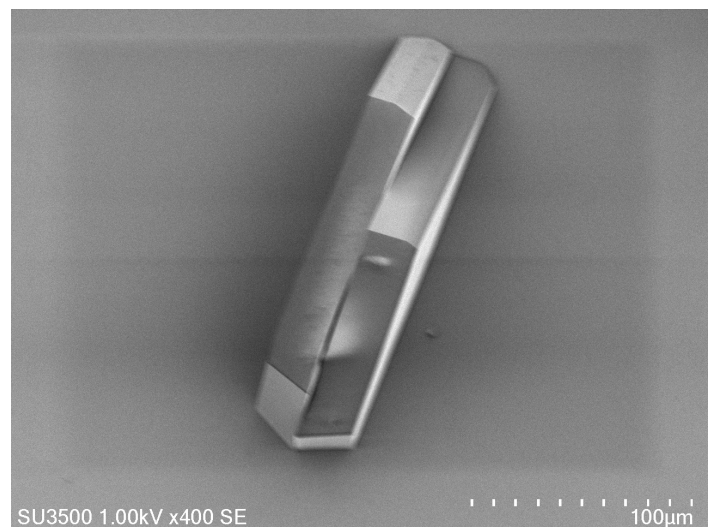

O%:  $1.93 \pm 0.79$

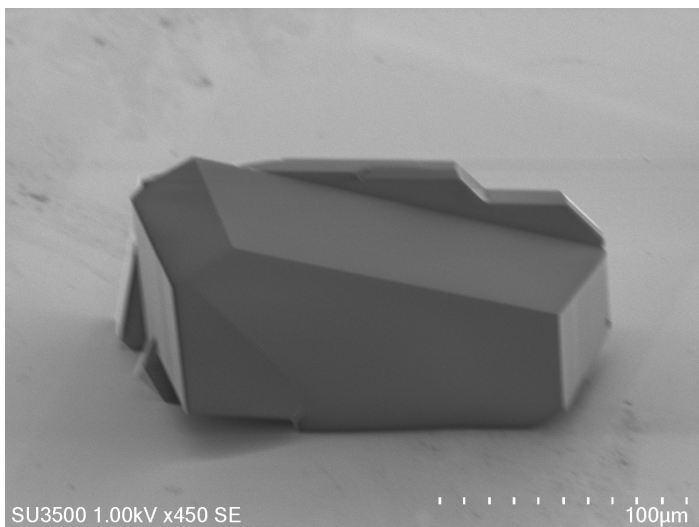

Tilt: 40°

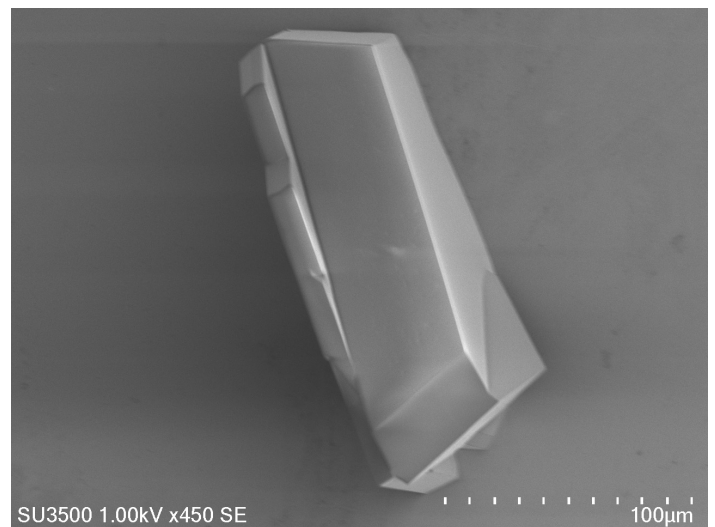

O%:  $2.04 \pm 0.67$

8h

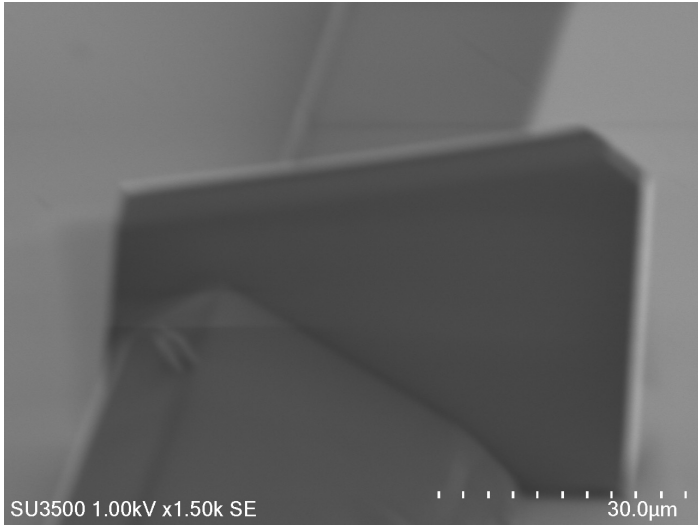

Tilt: 30°

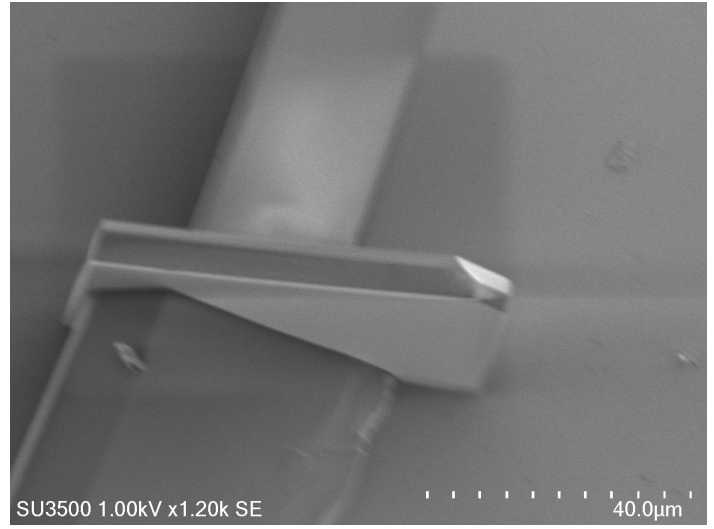

O%:  $2.73 \pm 0.96$

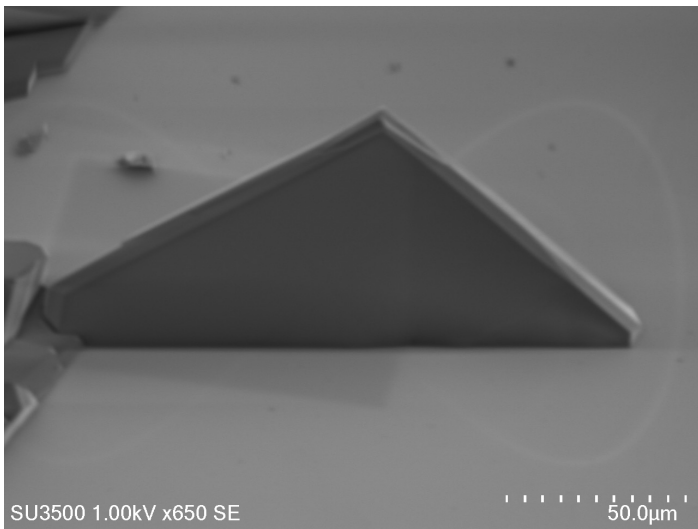

Tilt: 30°

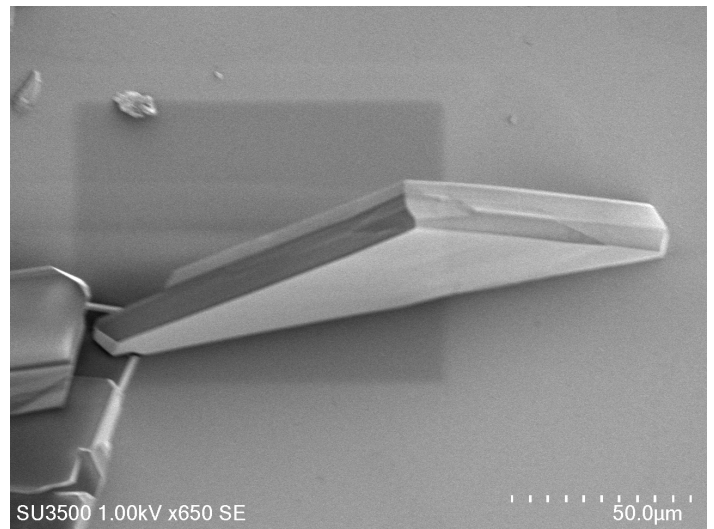

O%:  $1.94 \pm 0.54$

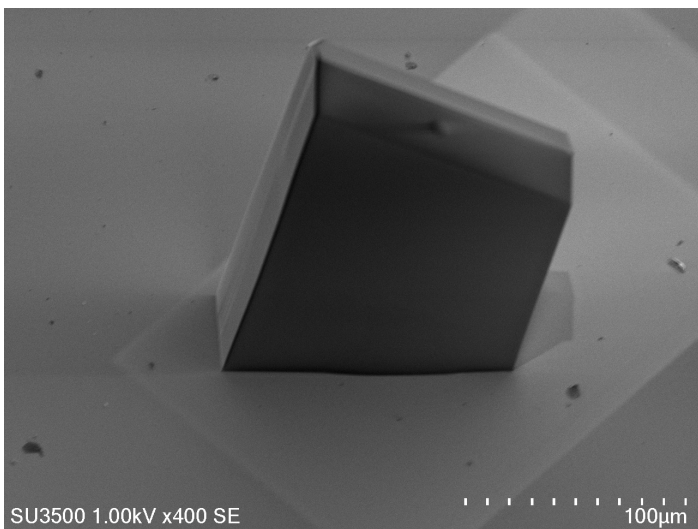

Tilt: 50°

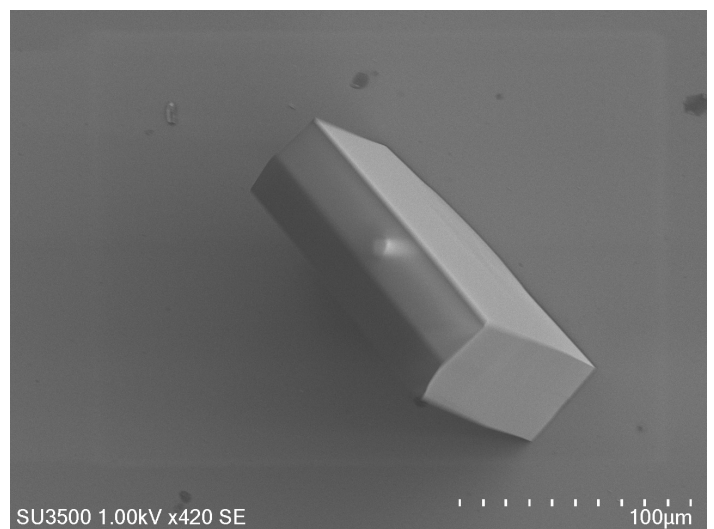

O%:  $2.30 \pm 0.72$

12h

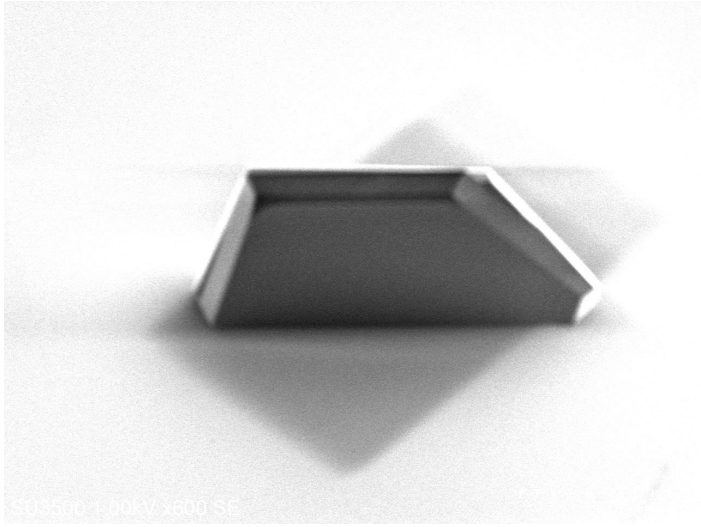

Tilt: 50°

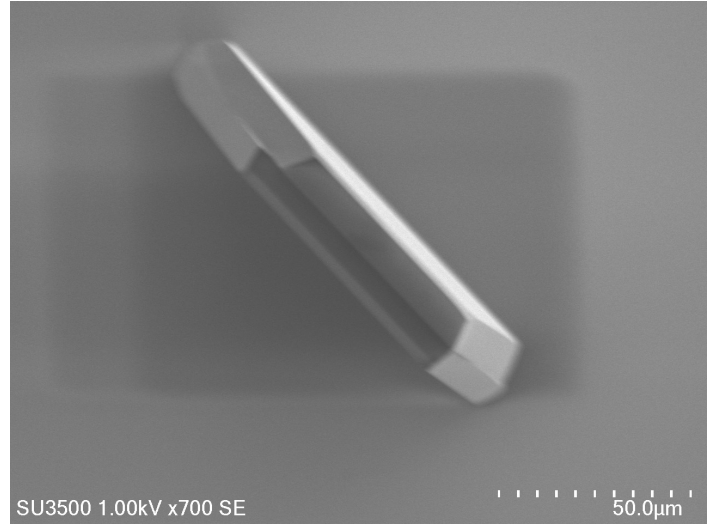

O%:  $4.62 \pm 1.34$

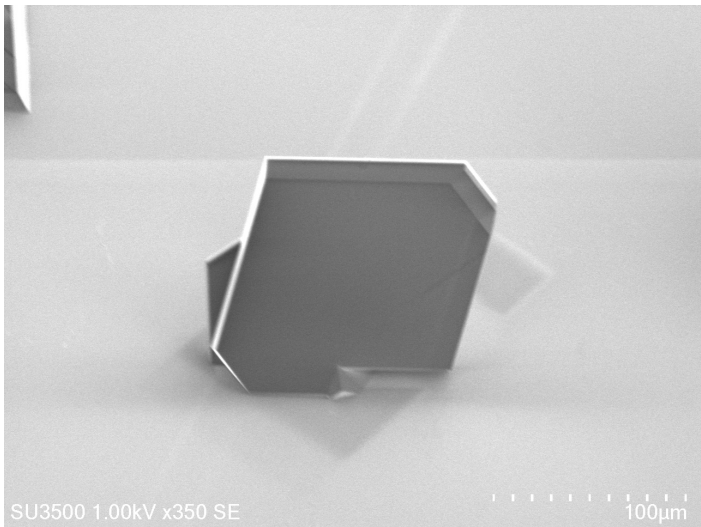

Tilt: 30°

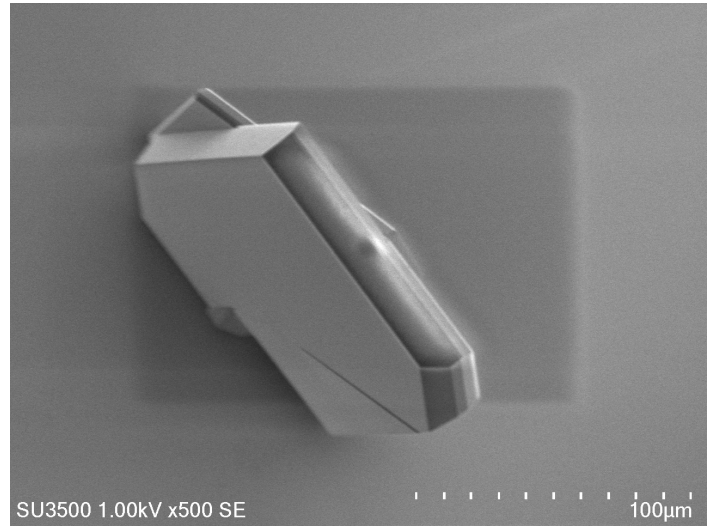

O%:  $3.15 \pm 0.96$

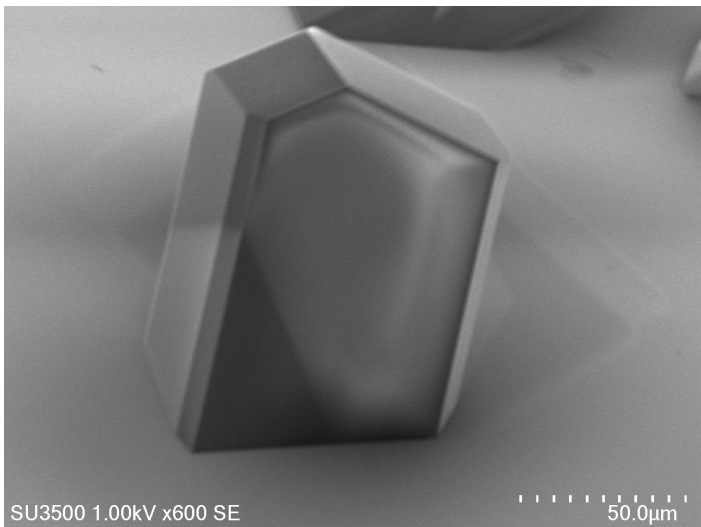

Tilt: 20°

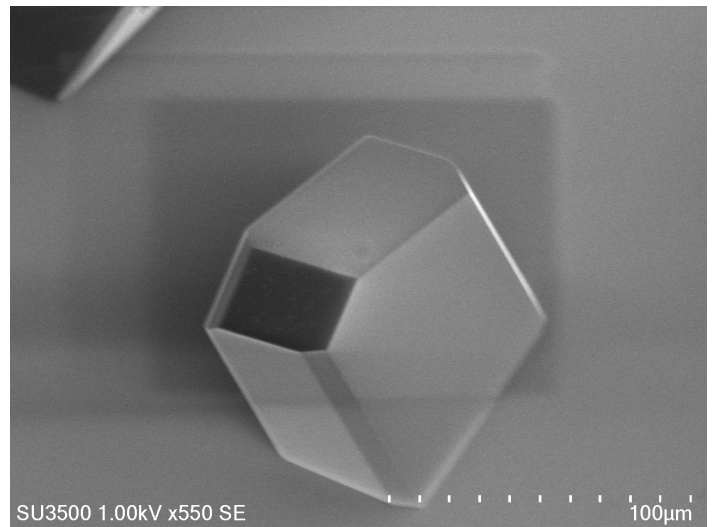

O%:  $3.06 \pm 0.74$

12h

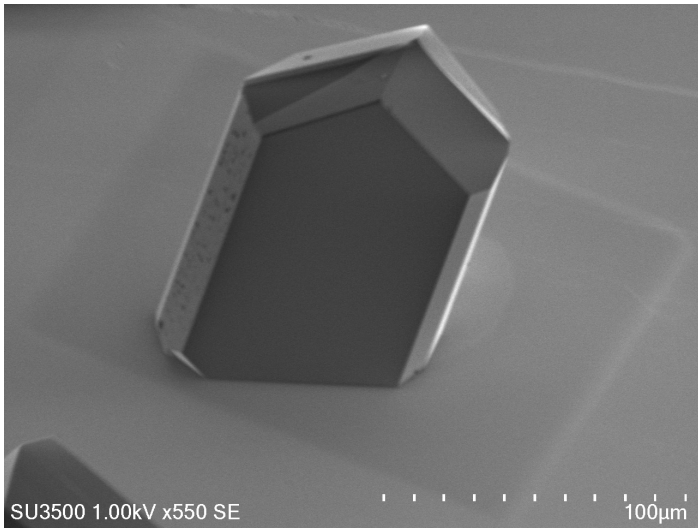

Tilt: 40°

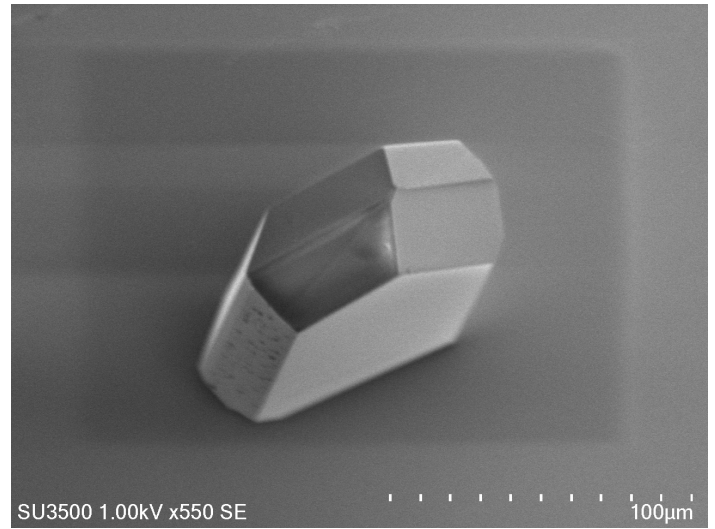

O%:  $2.83 \pm 0.91$

16h

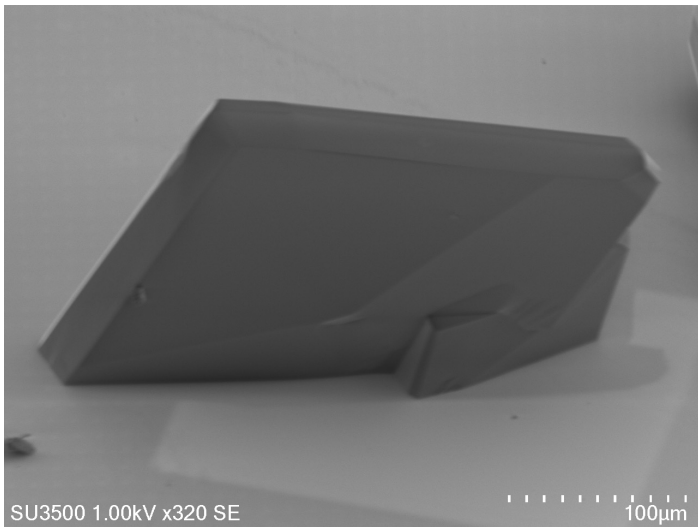

Tilt: 34°

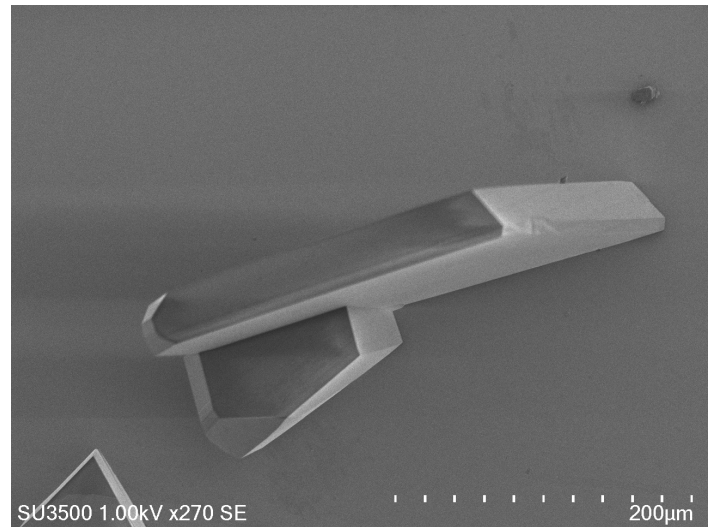

O%:  $3.17 \pm 0.98$

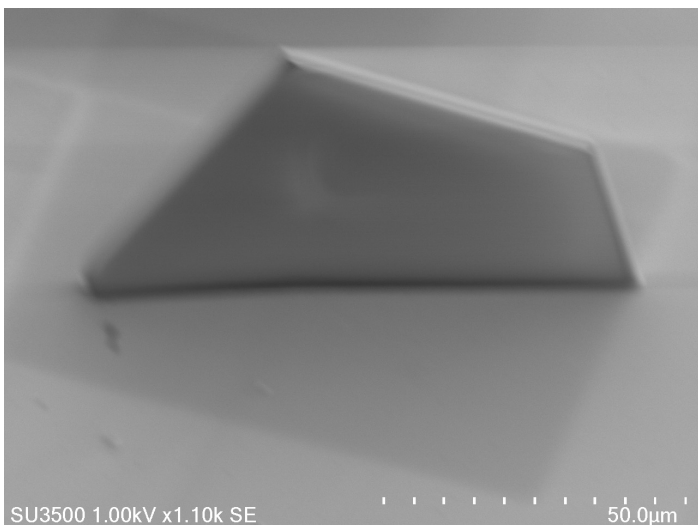

Tilt: 40°

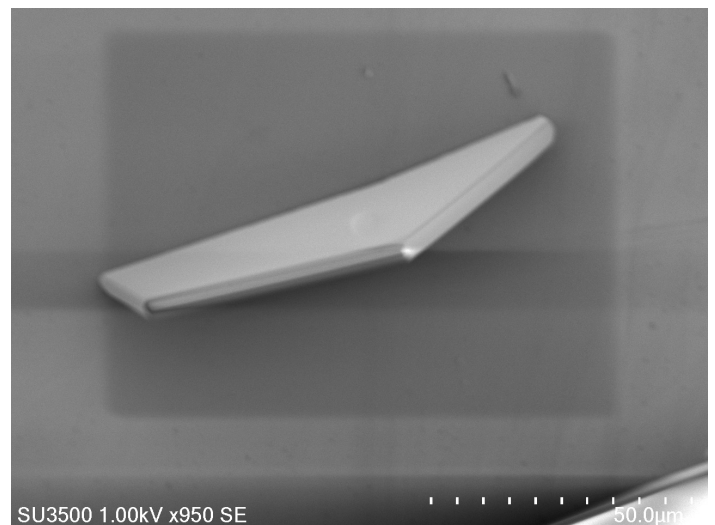

O%:  $4.58 \pm 1.52$

16h

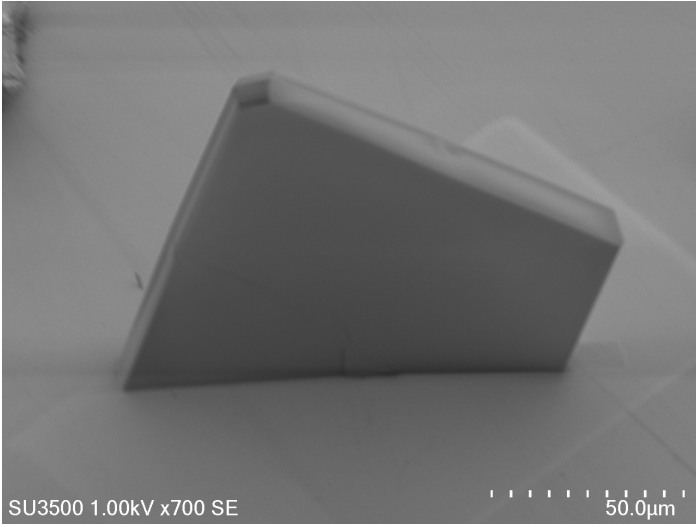

Tilt: 50°

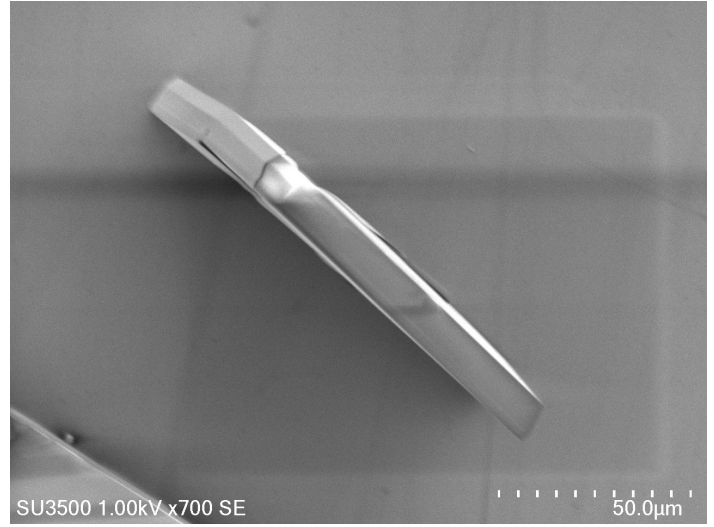

O%:  $4.01 \pm 1.01$

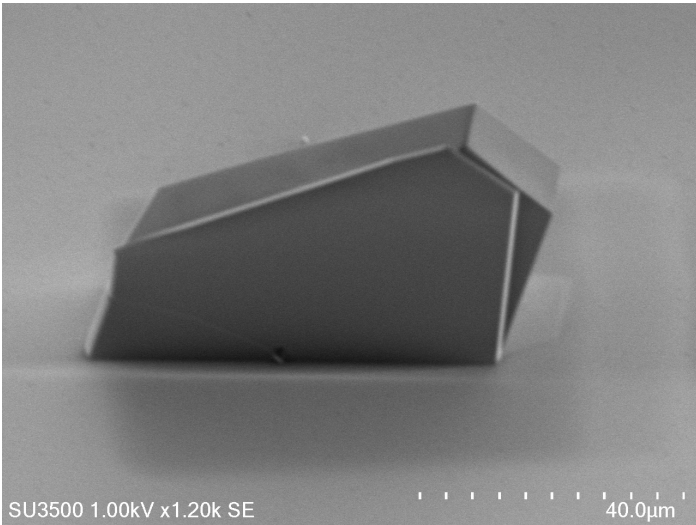

Tilt: 50°

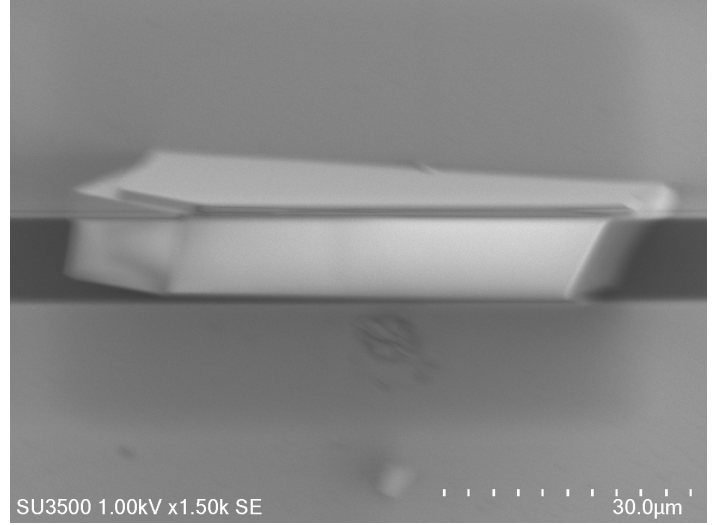

O%:  $3.51 \pm 0.92$

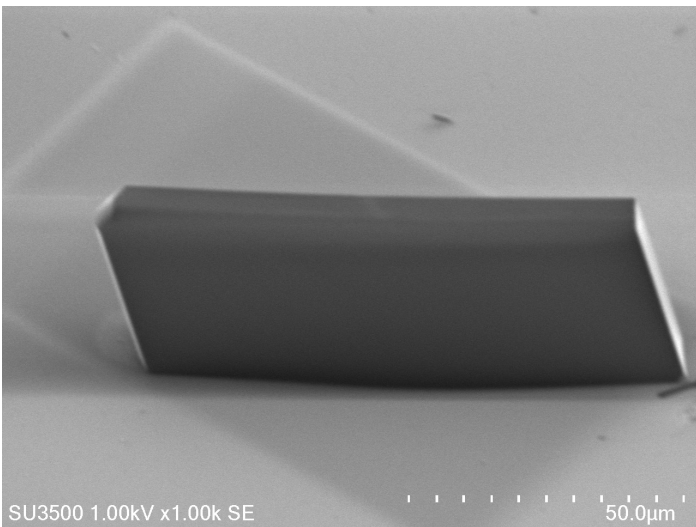

Tilt: 40°

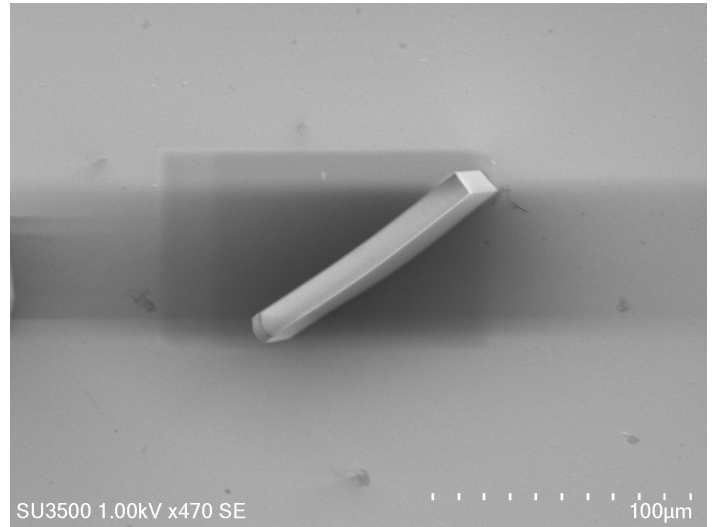

O%:  $4.76 \pm 1.08$

(111)

4h

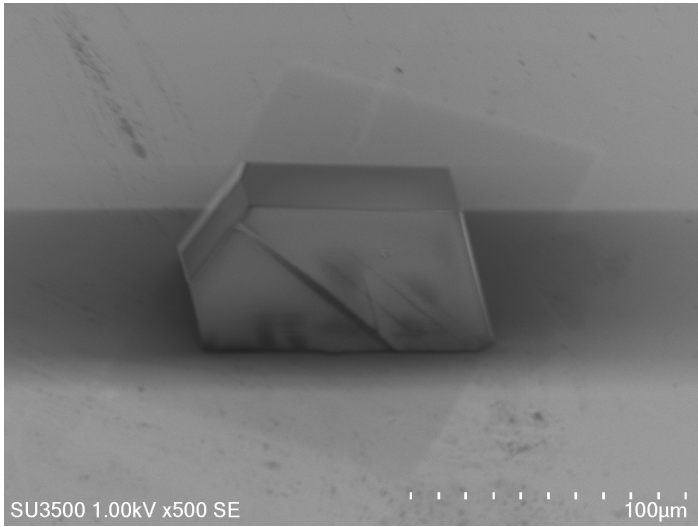

Tilt: 20°

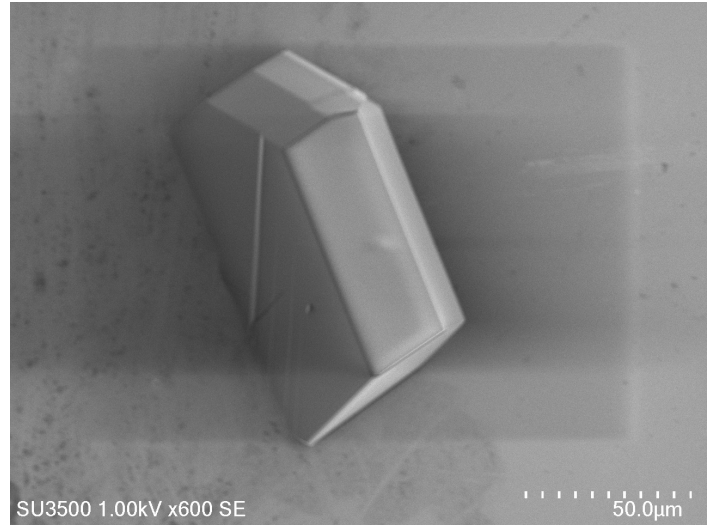

O%:  $1.73 \pm 0.65$

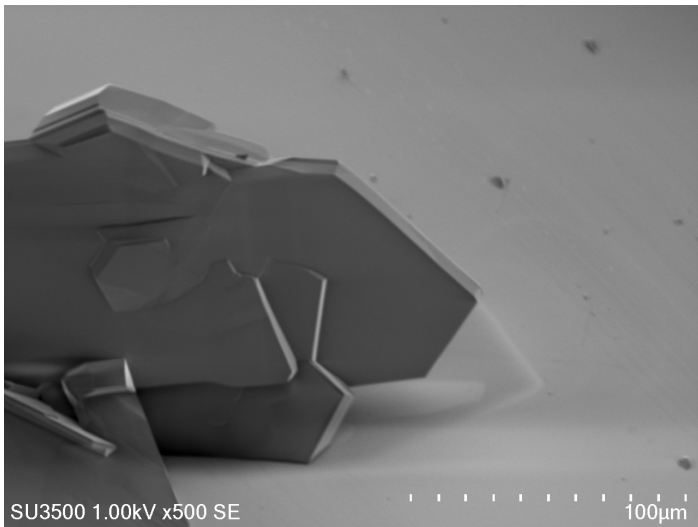

Tilt: 40°

8h

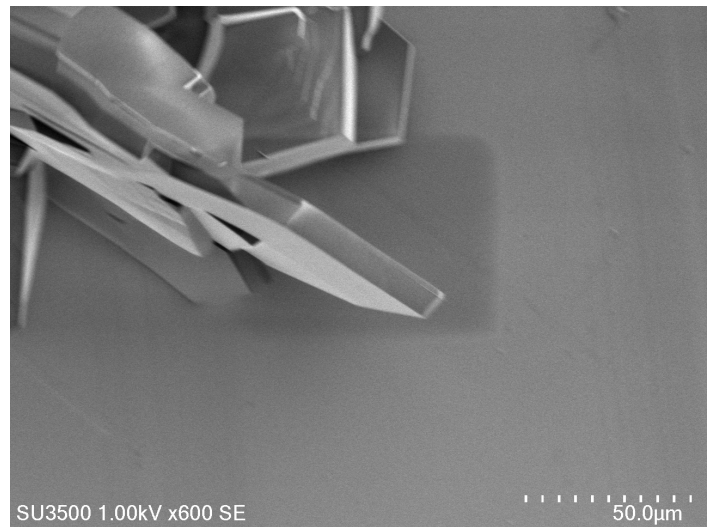

O%:  $3.49 \pm 0.78$

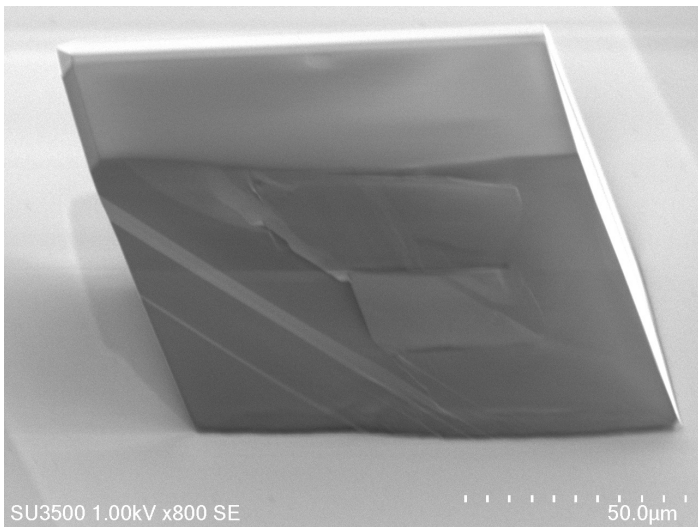

Tilt: 40°

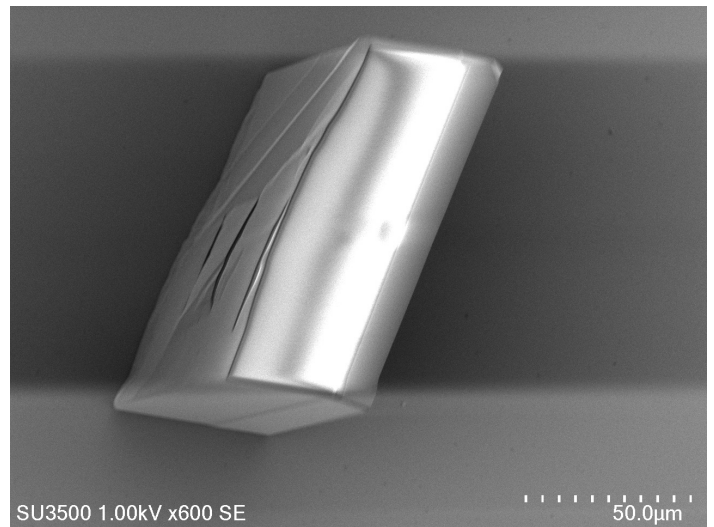

O%:  $2.97 \pm 0.85$

8h

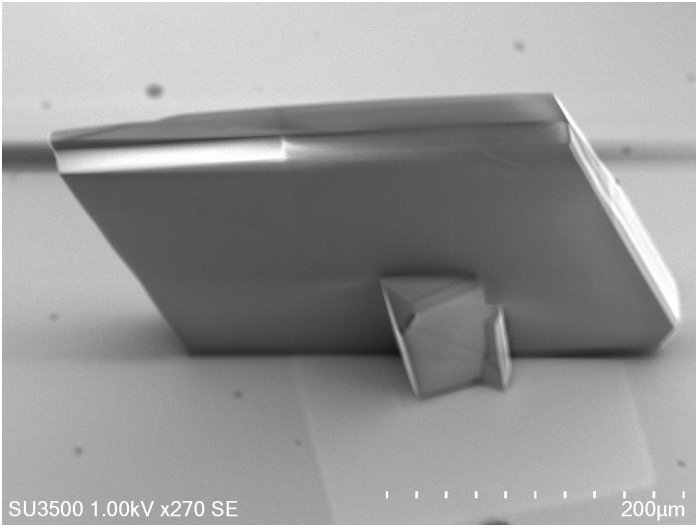

Tilt: 50°

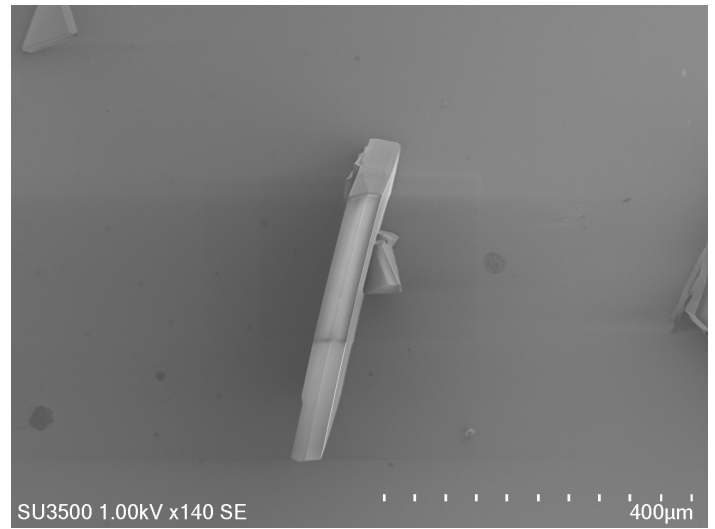

O%:  $3.15 \pm 0.81$

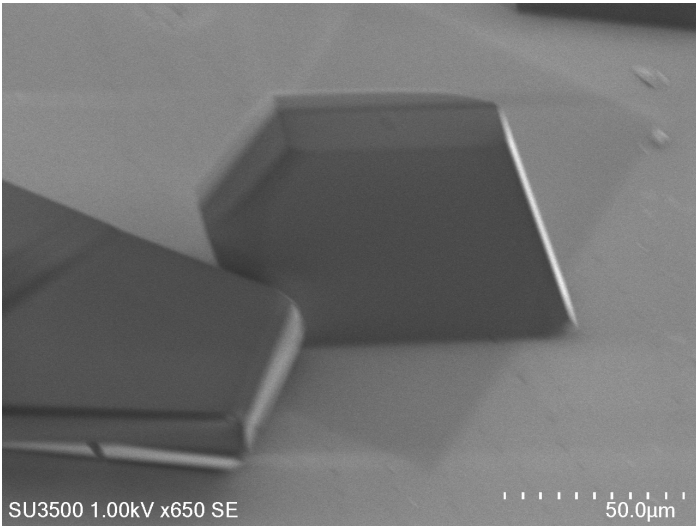

Tilt: 40°

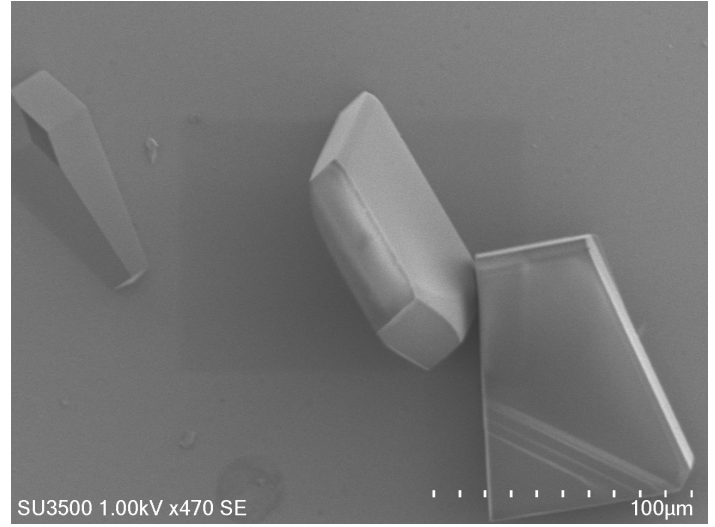

O%:  $2.56 \pm 1.03$

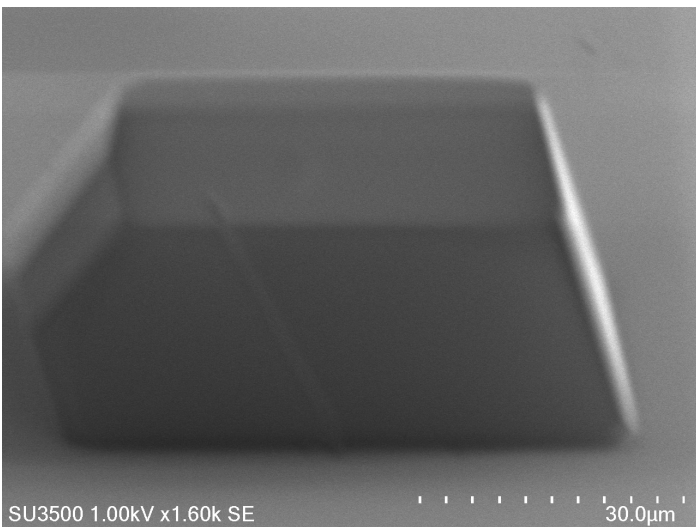

Tilt: 30°

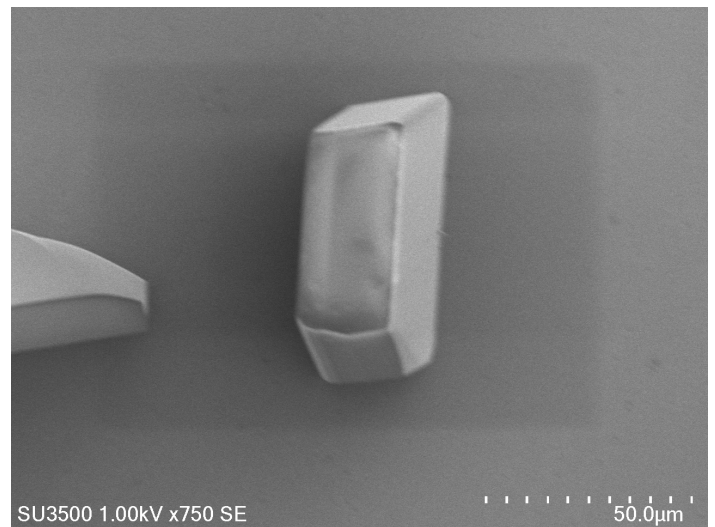

O%:  $2.81 \pm 0.91$



16h

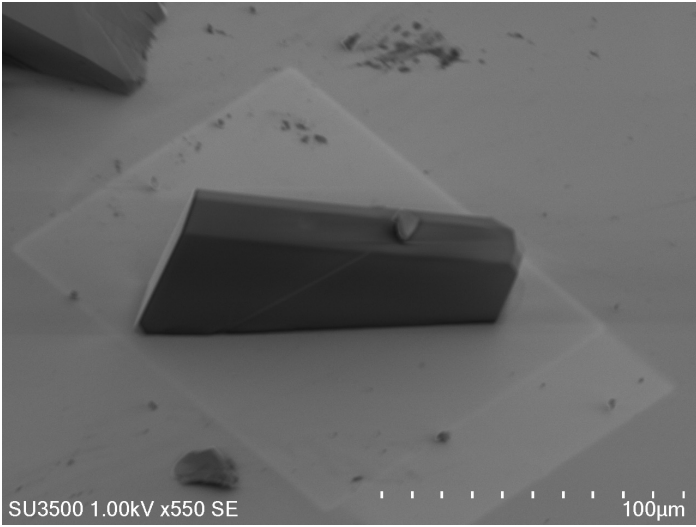

Tilt: 34°

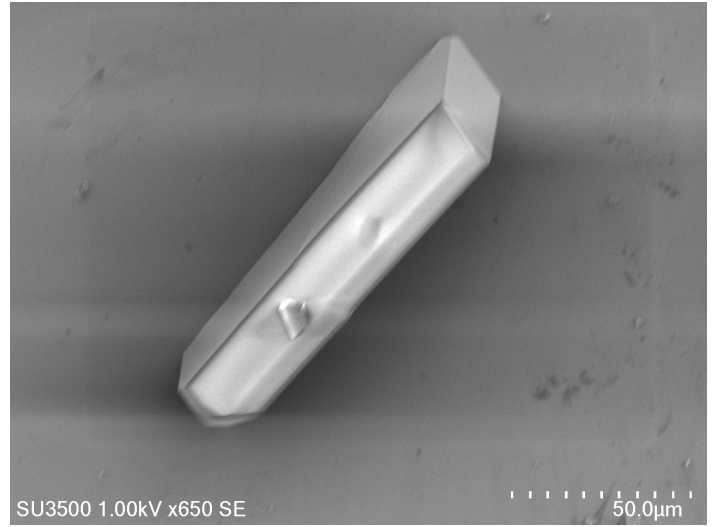

O%:  $3.19 \pm 1.03$

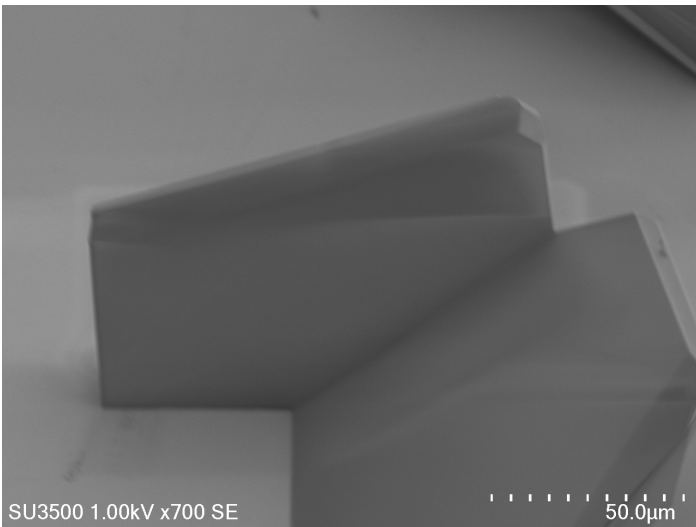

Tilt: 40°

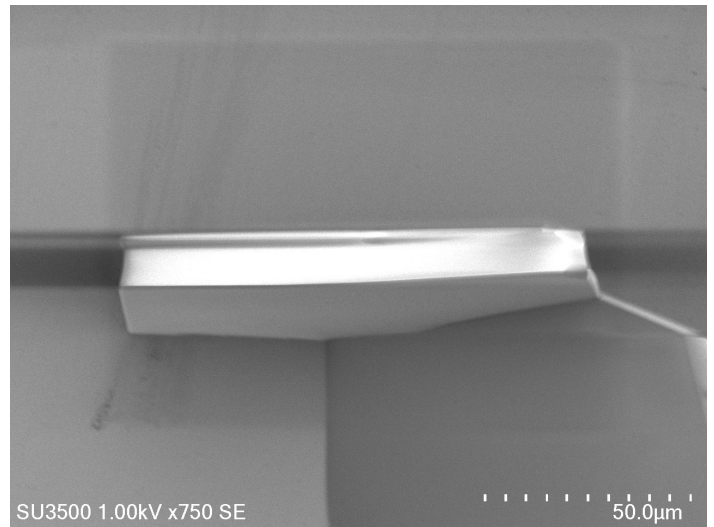

O%:  $3.07 \pm 0.81$

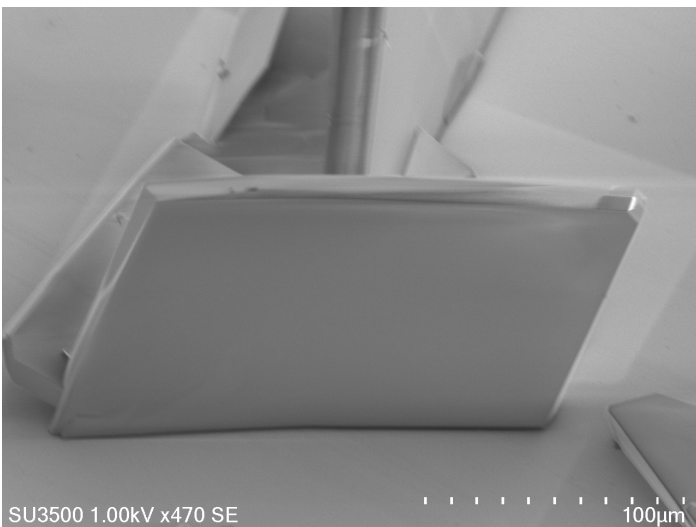

Tilt: 50°

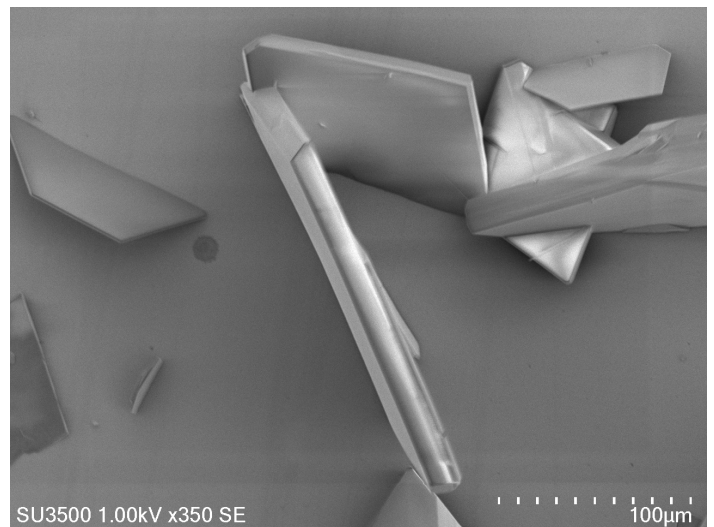

O%:  $10.13 \pm 3.61$

Grubbs Test Removed

16h

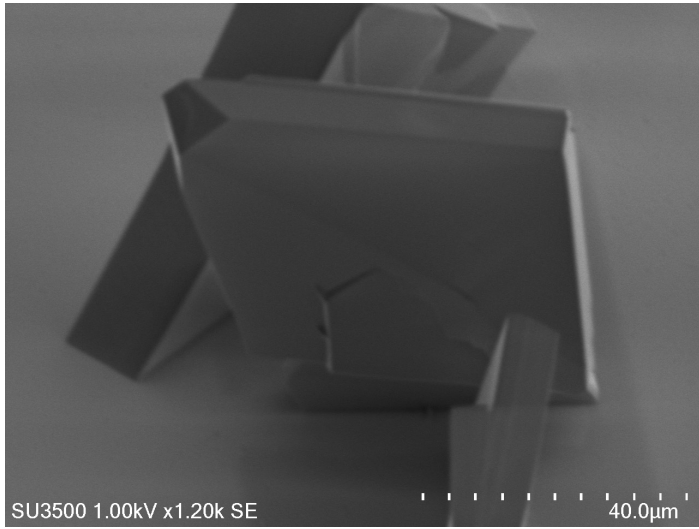

Tilt: 50°

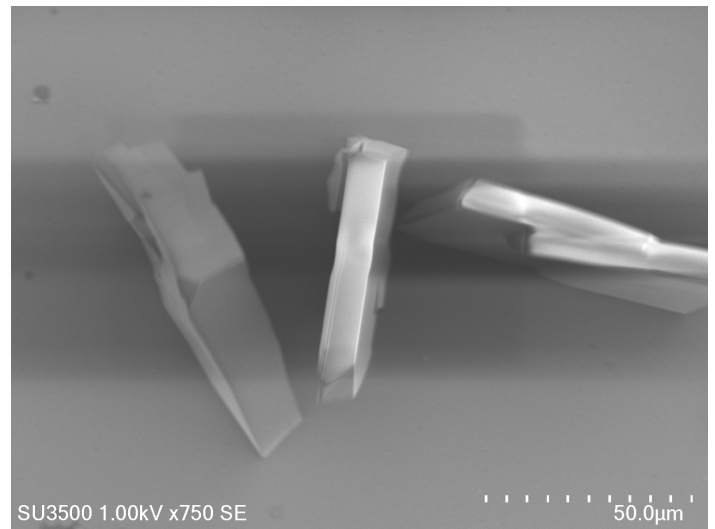

O%:  $4.26 \pm 1.33$

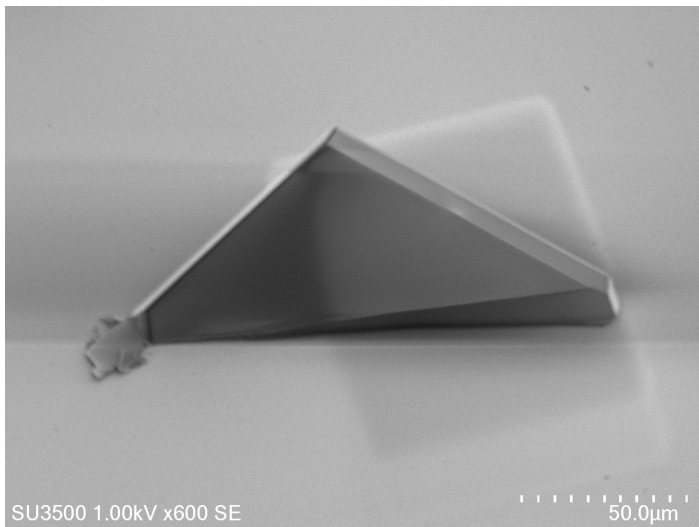

Tilt: 30°

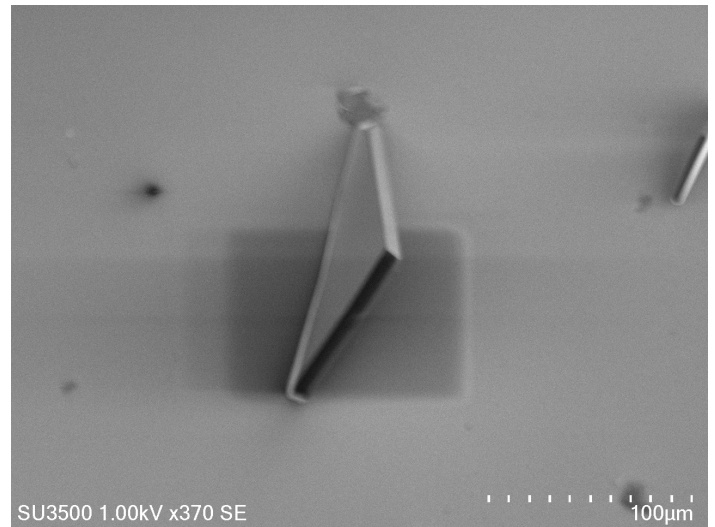

O%:  $4.44 \pm 1.09$

(111)  
8h

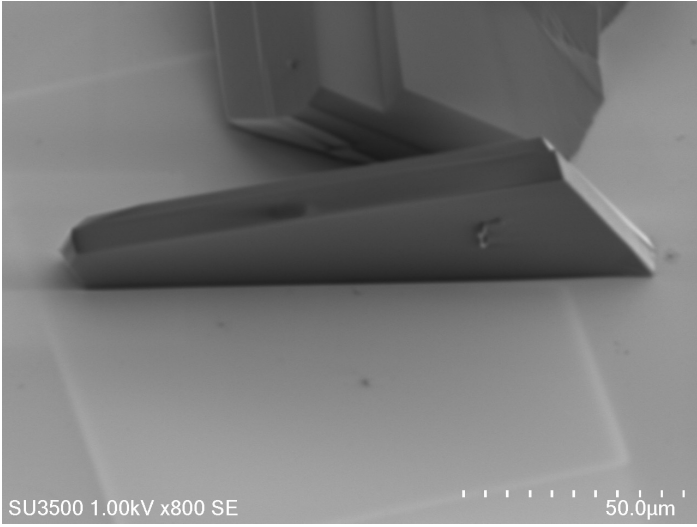

Tilt: 40°

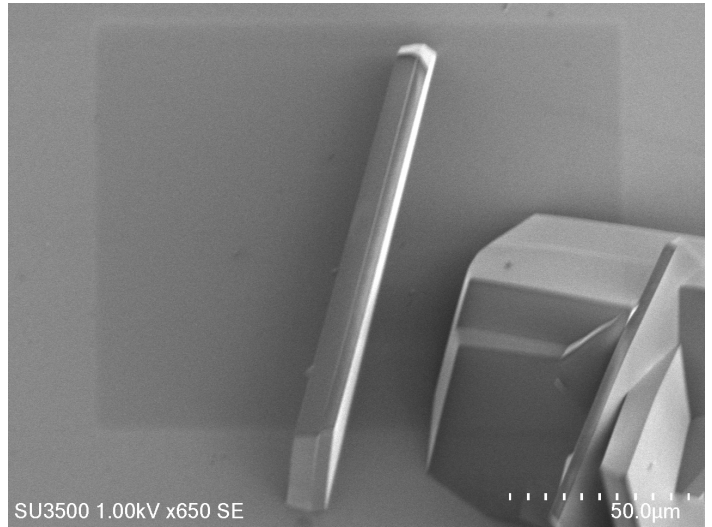

O%:  $4.91 \pm 1.19$

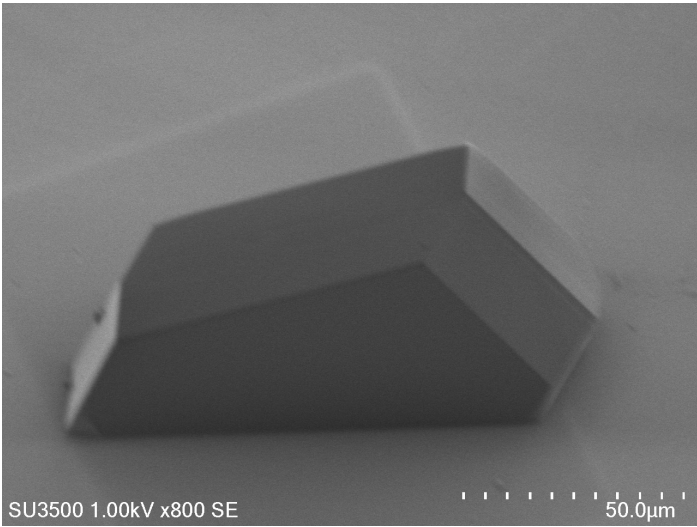

Tilt: 50°

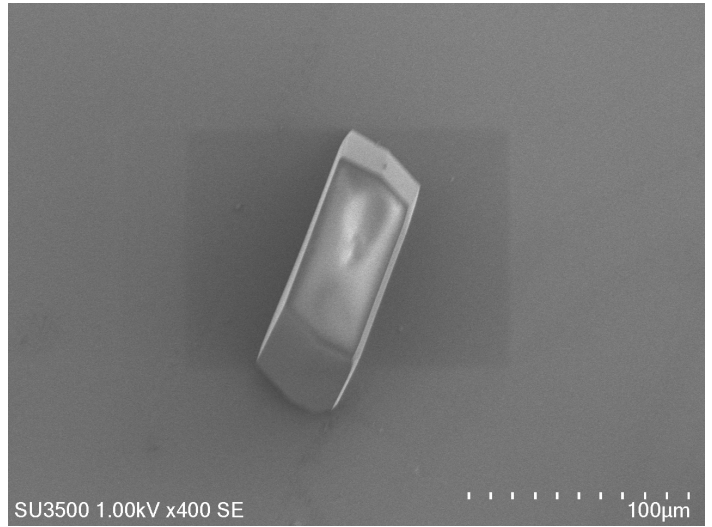

O%:  $3.10 \pm 0.72$

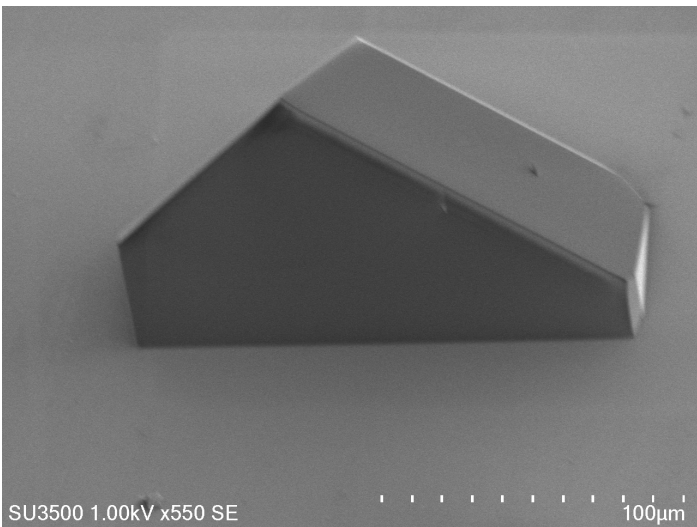

Tilt: 30°

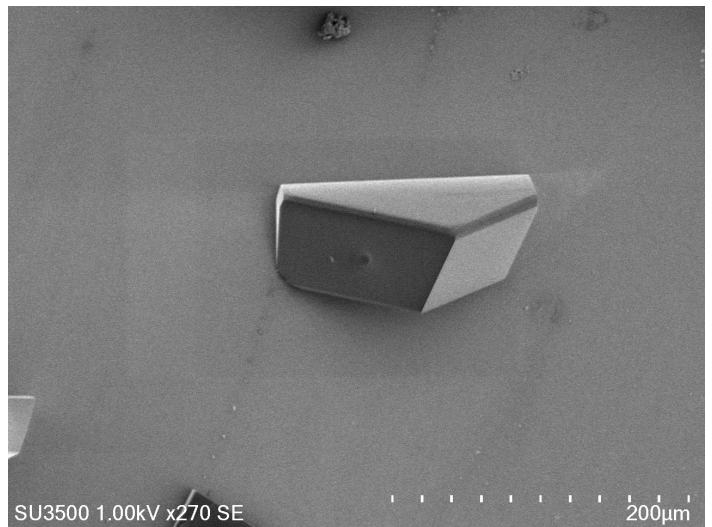

O%:  $4.05 \pm 0.92$

12h

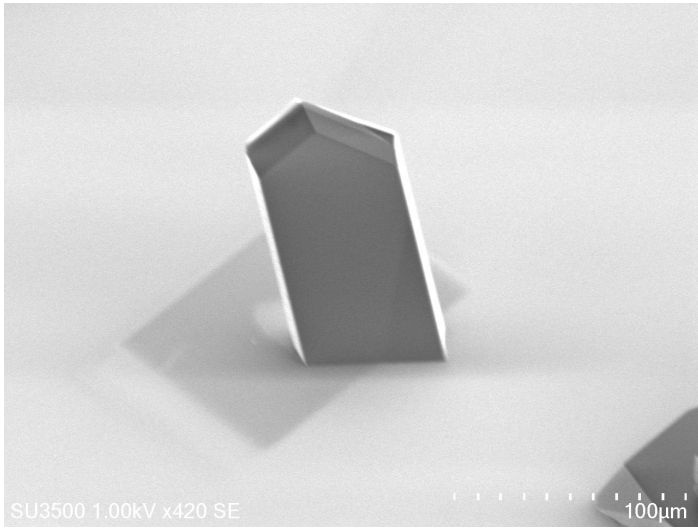

Tilt: 40°

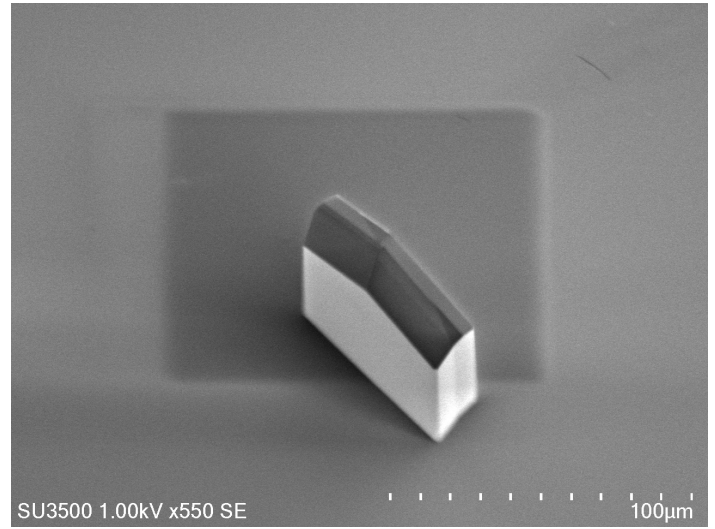

O%:  $3.84 \pm 1.04$

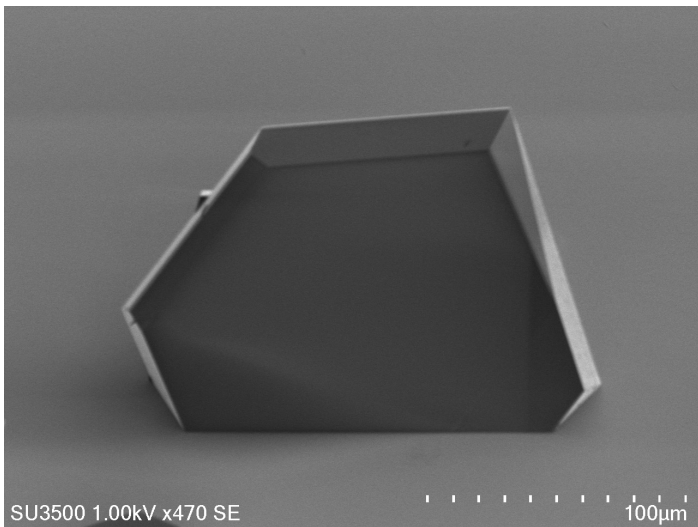

Tilt: 30°

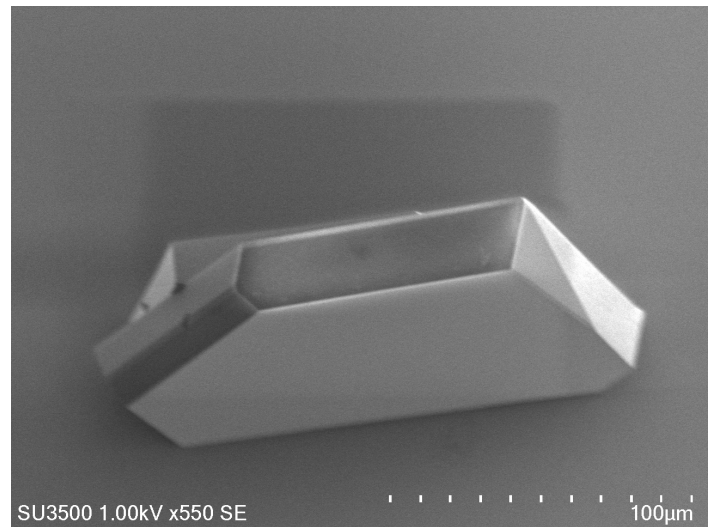

O%:  $2.28 \pm 0.64$

16h

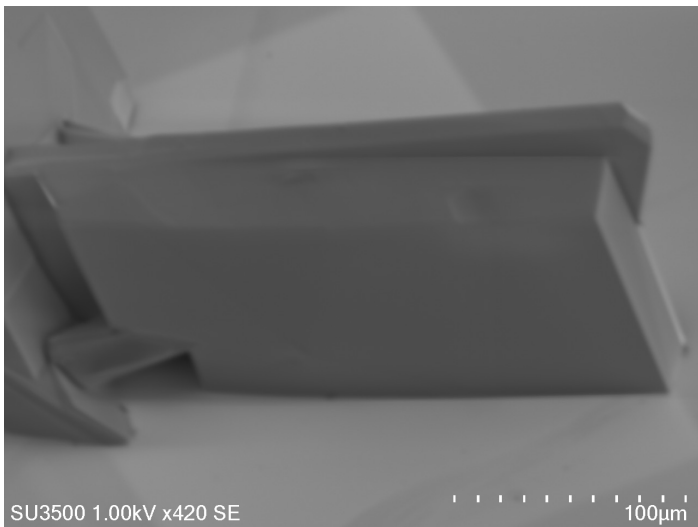

Tilt: 40°

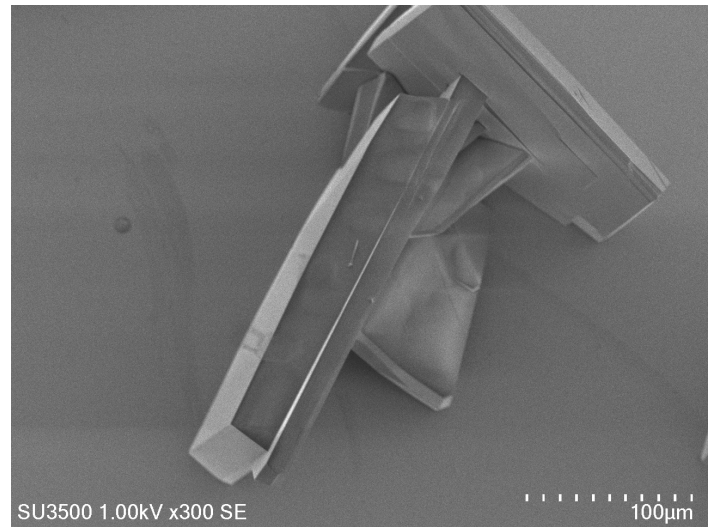

O%:  $11.67 \pm 2.32$

16h

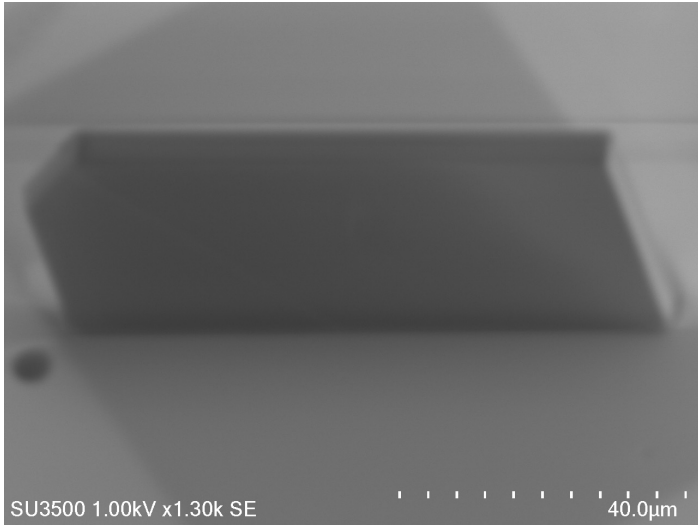

Tilt: 50°

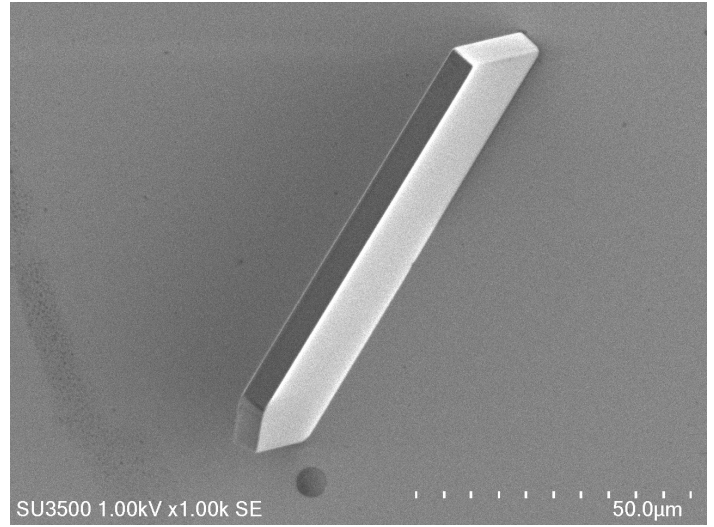

O%:  $11.87 \pm 2.81$

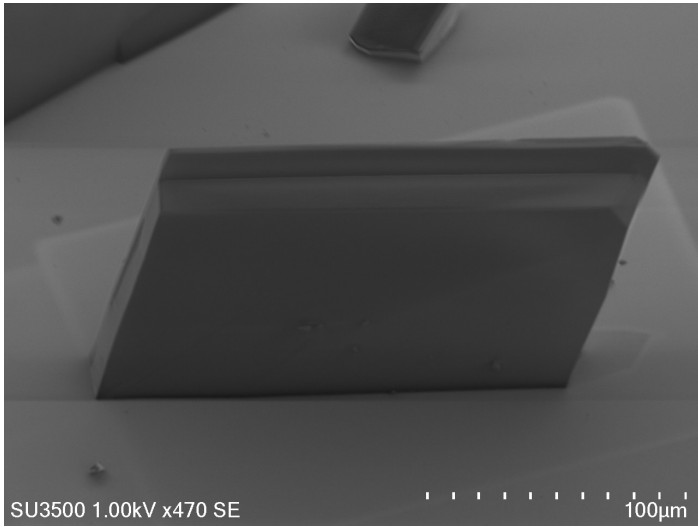

Tilt: 40°

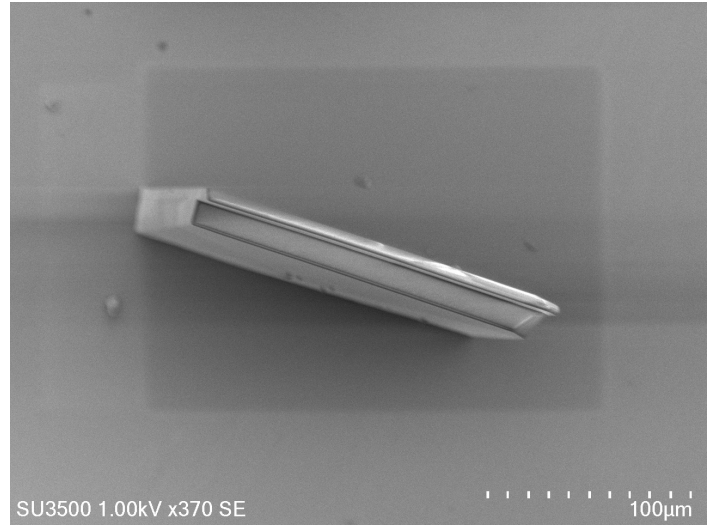

O%:  $9.17 \pm 2.85$

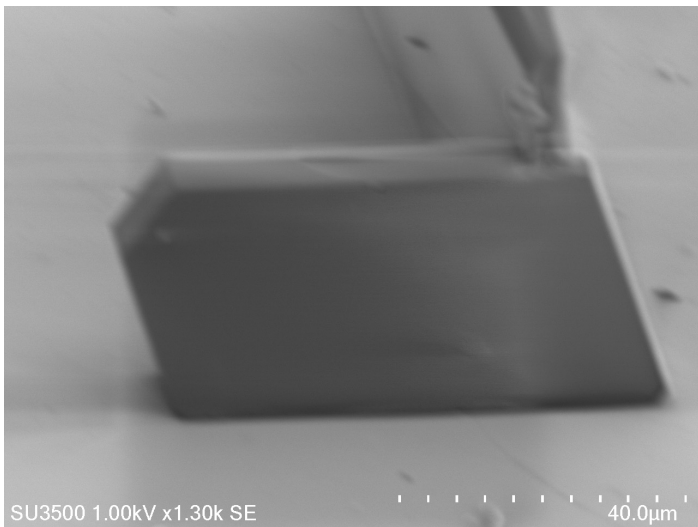

Tilt: 30°

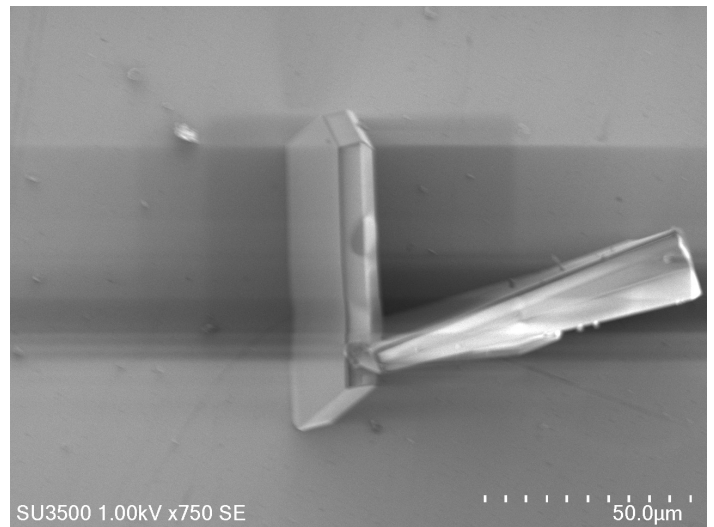

O%:  $4.96 \pm 1.43$

Grubbs Test Removed

(111)

0h

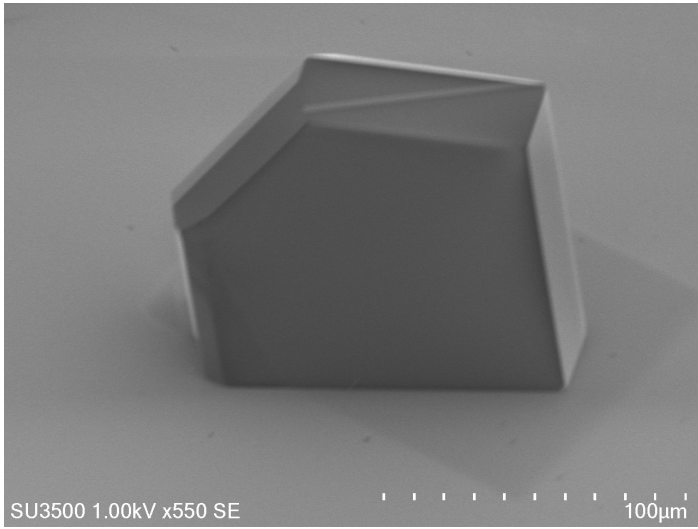

Tilt: 30°

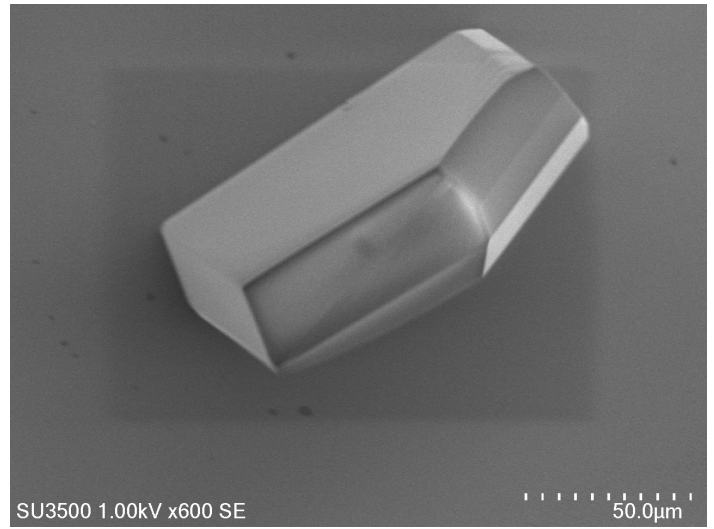

O%:  $1.23 \pm 0.48$

4h

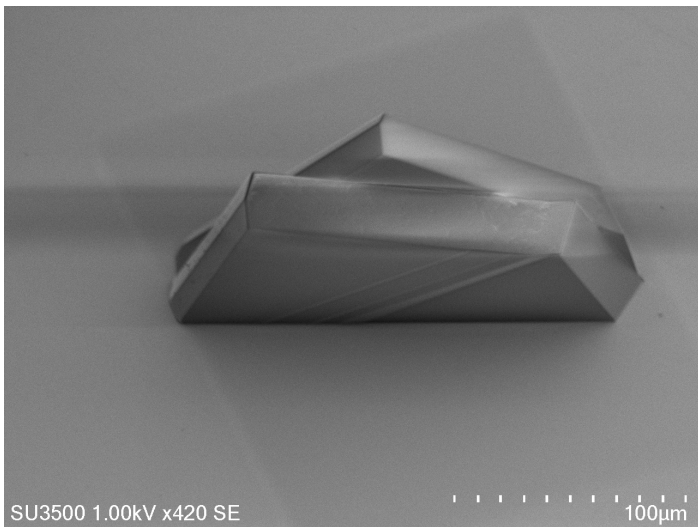

Tilt: 50°

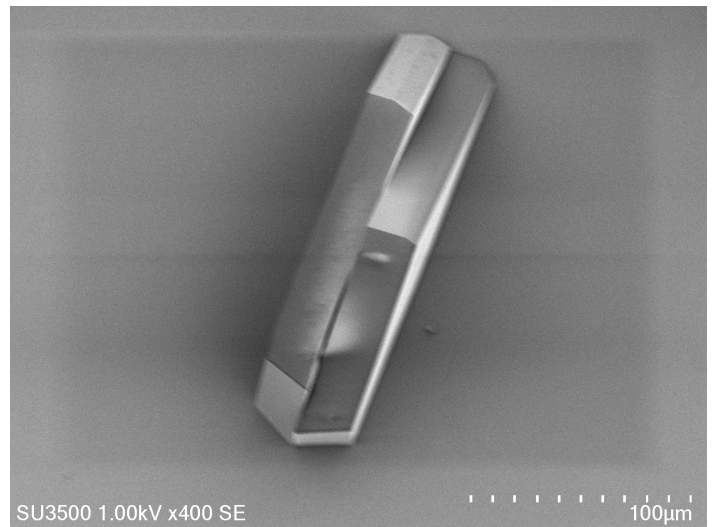

O%:  $3.63 \pm 1.00$

8h

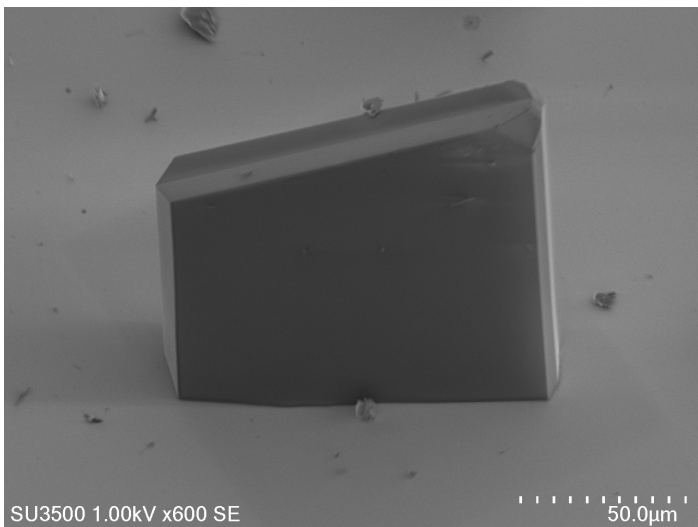

Tilt: 30°

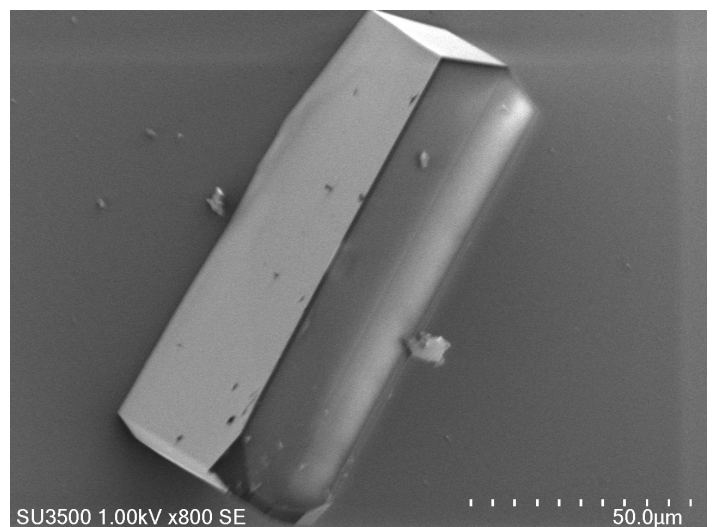

O%:  $3.89 \pm 0.98$

8h

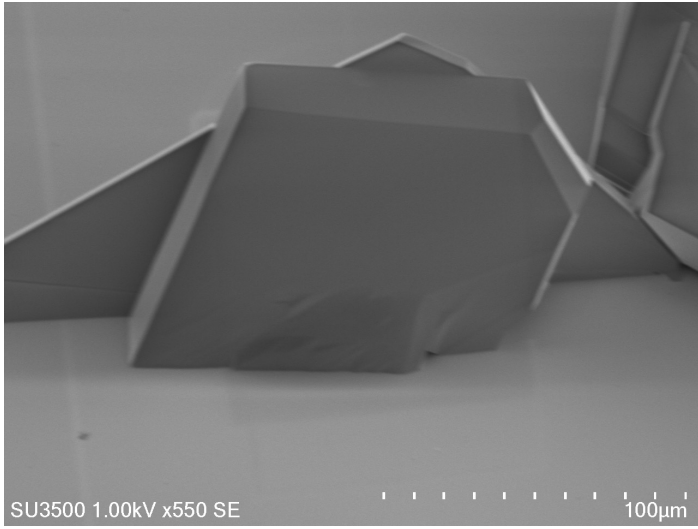

Tilt: 30°

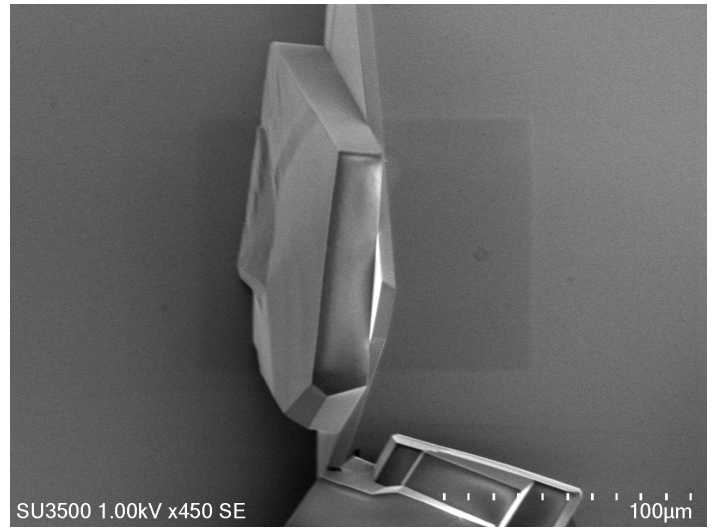

O%:  $1.95 \pm 0.58$

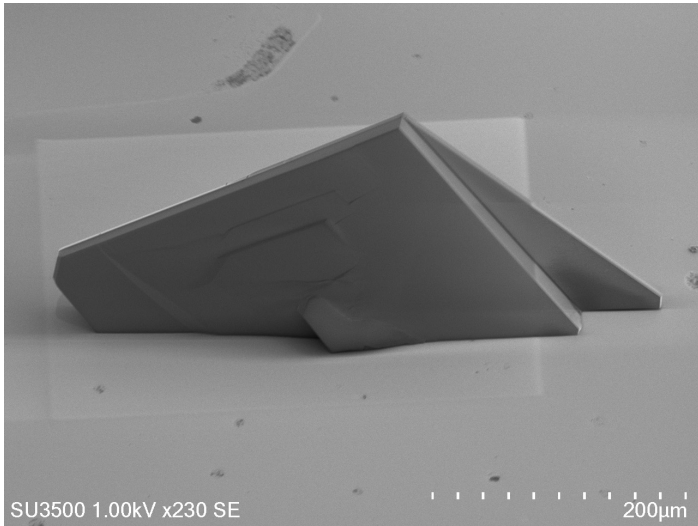

Tilt: 30°

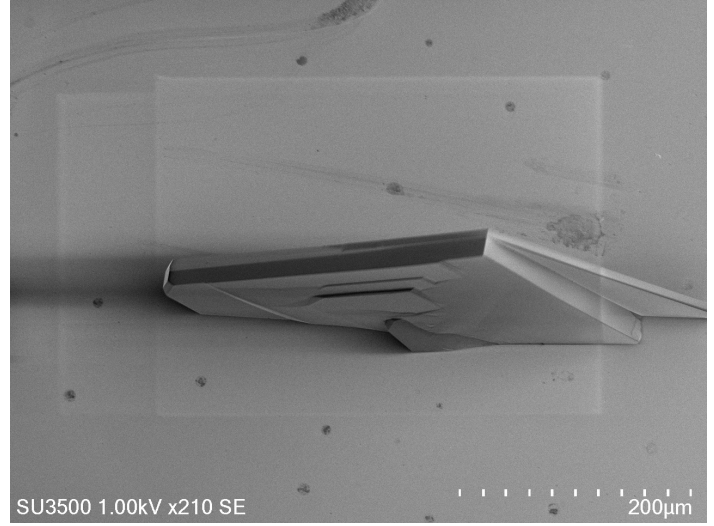

O%:  $2.92 \pm 0.85$

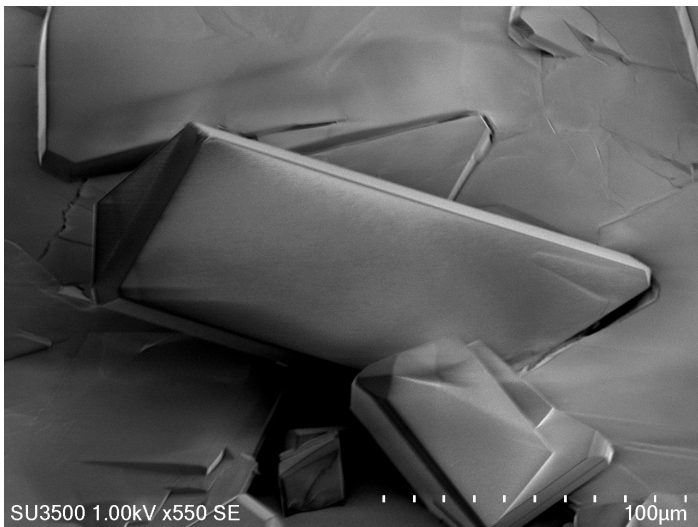

Tilt: 20°

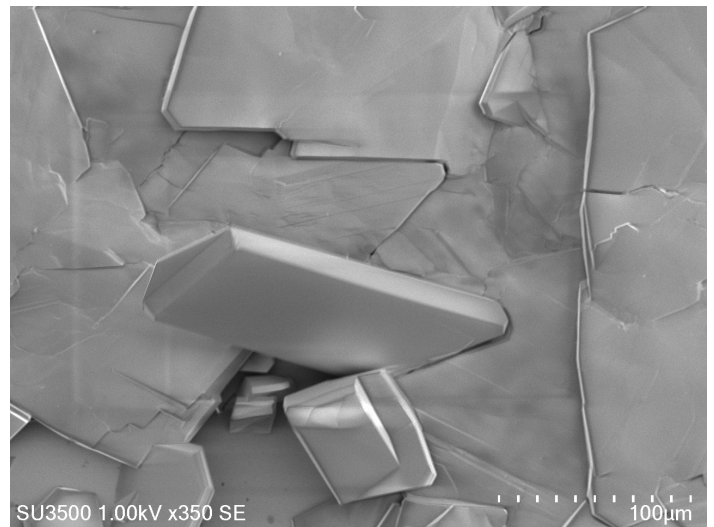

O%:  $2.94 \pm 0.90$

8h

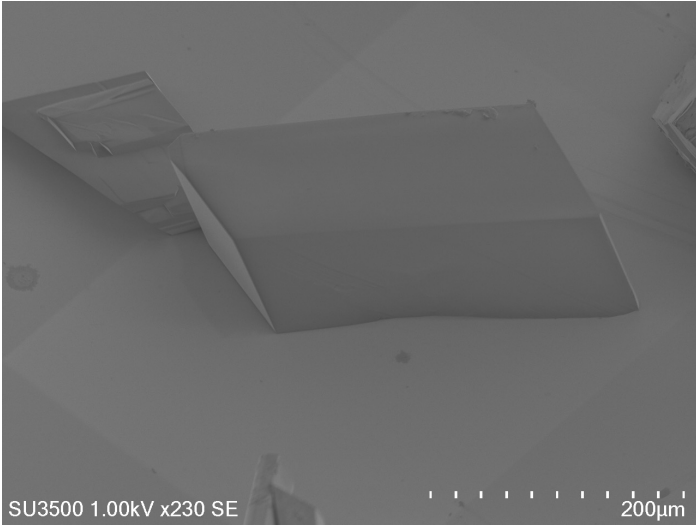

Tilt: 50°

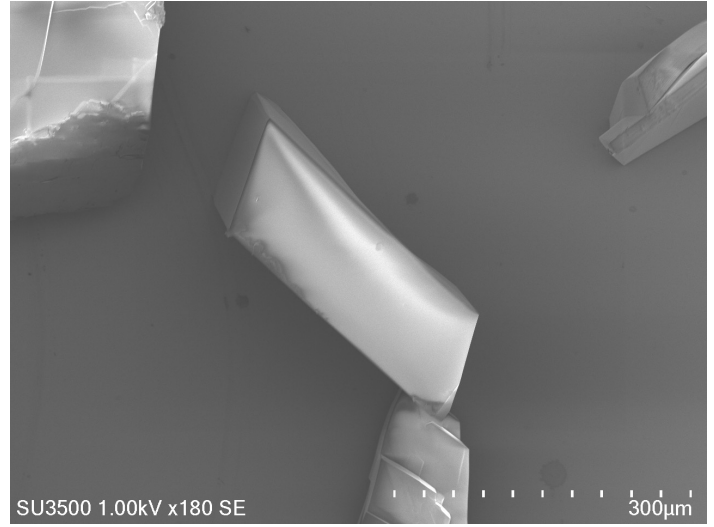

O%:  $3.77 \pm 0.96$

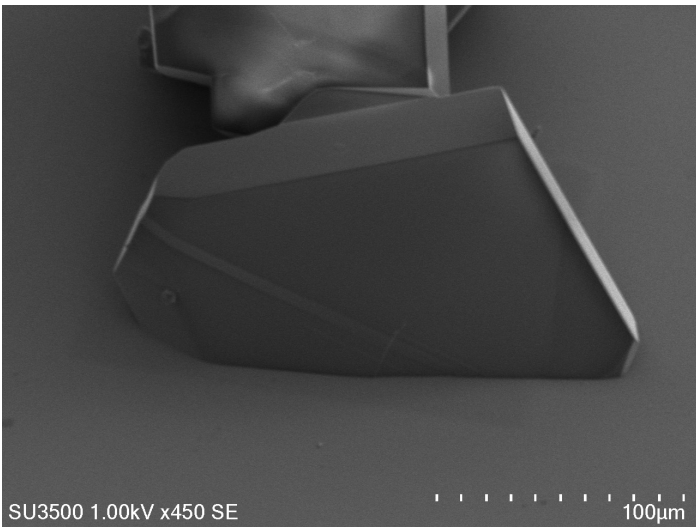

Tilt: 30°

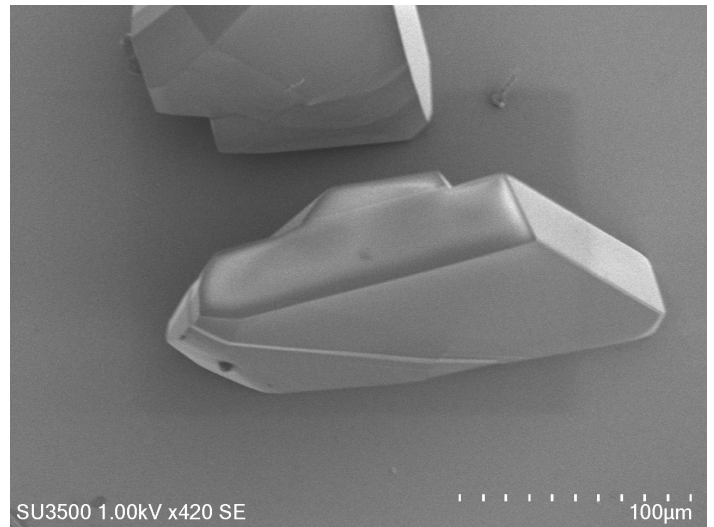

O%:  $3.00 \pm 0.74$

12h

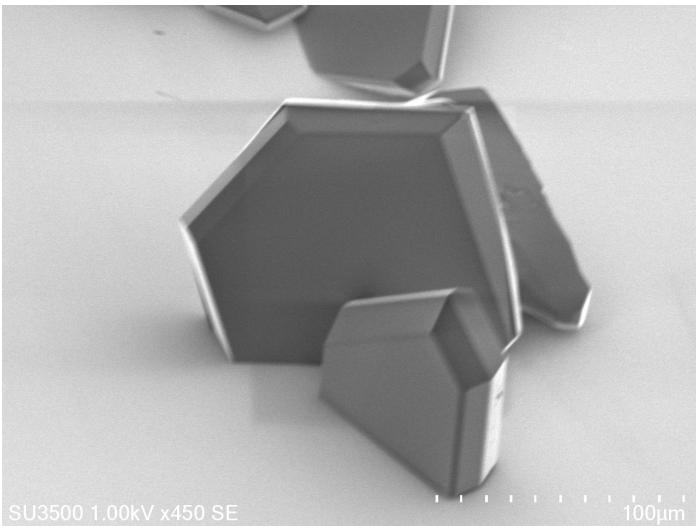

Tilt: 30°

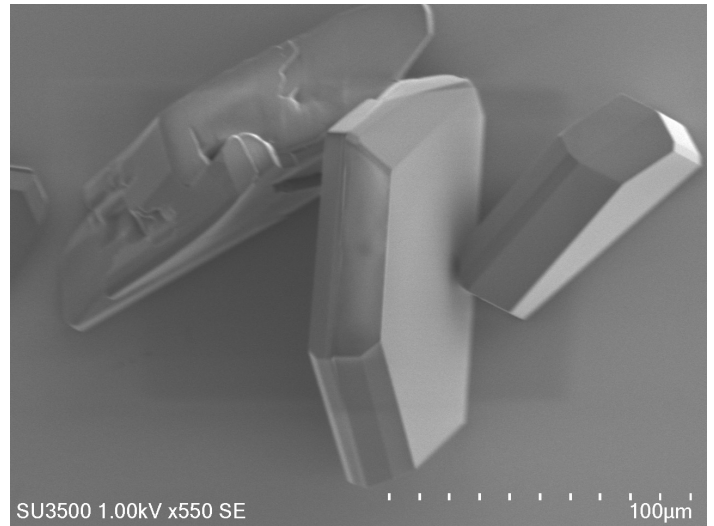

O%:  $3.23 \pm 0.98$



16h

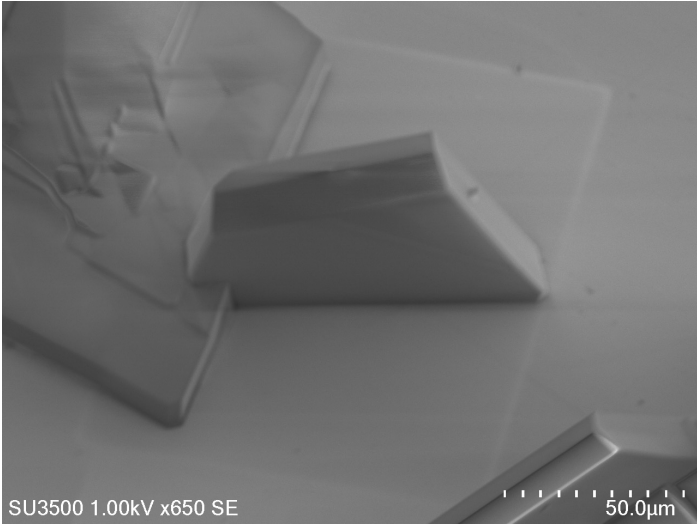

Tilt: 50°

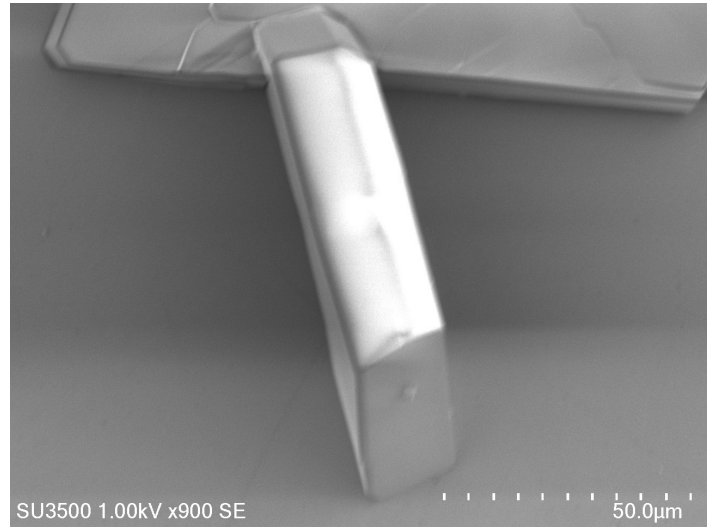

O%:  $2.78 \pm 0.94$

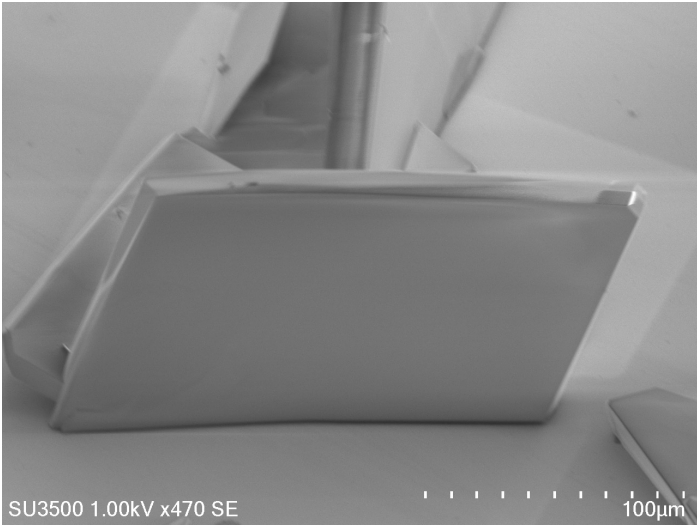

Tilt: 50°

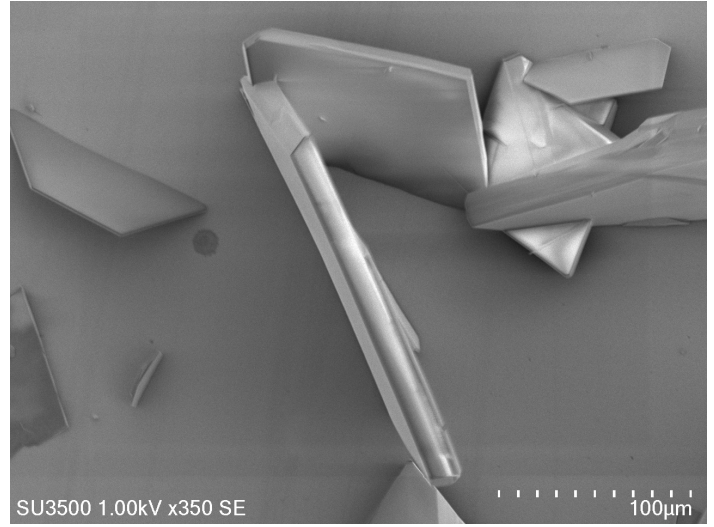

O%:  $7.62 \pm 2.11$

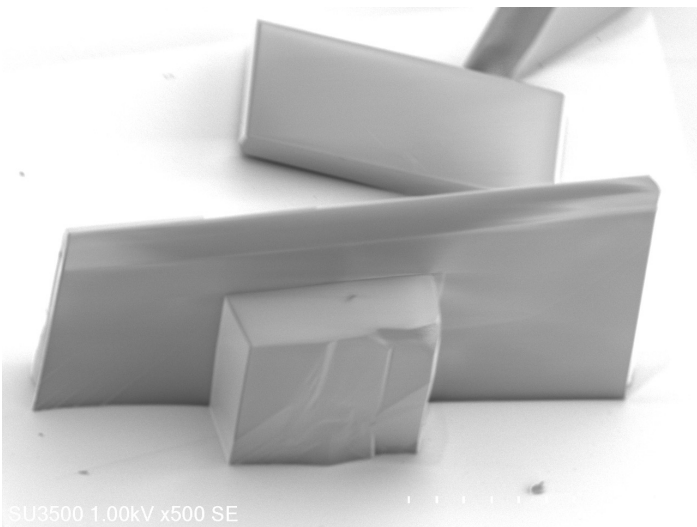

Tilt: 40°

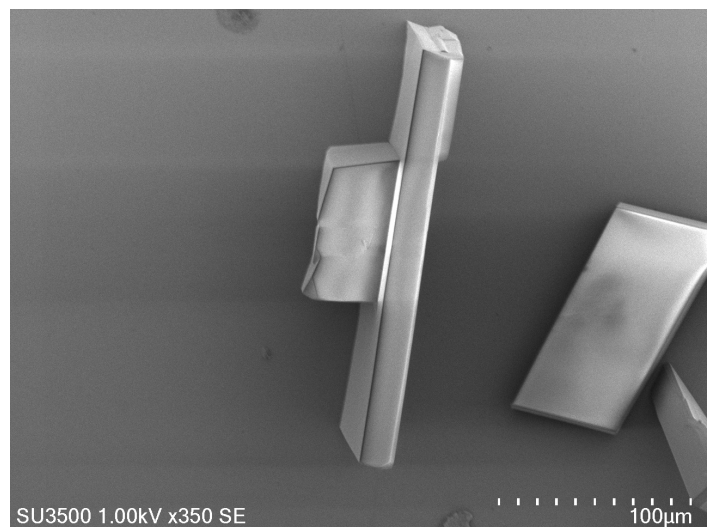

O%:  $3.87 \pm 1.28$

(111)  
12h

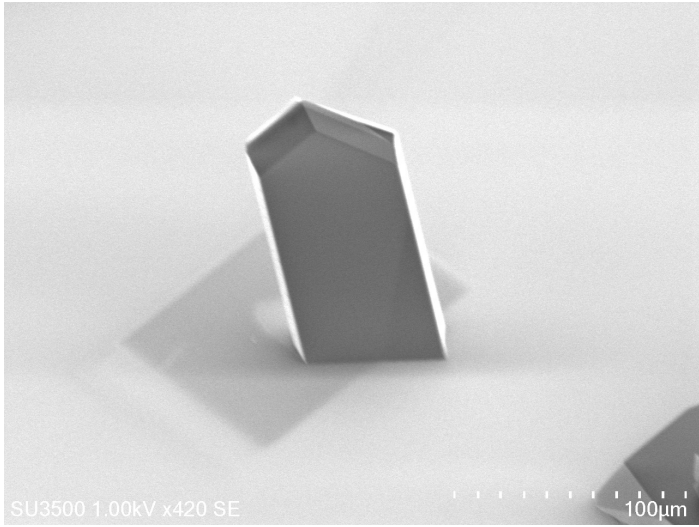

Tilt: 40°

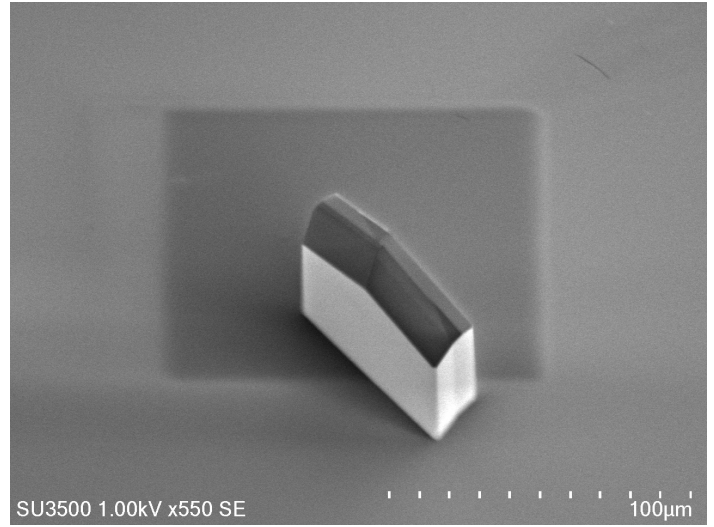

O%:  $4.59 \pm 1.26$

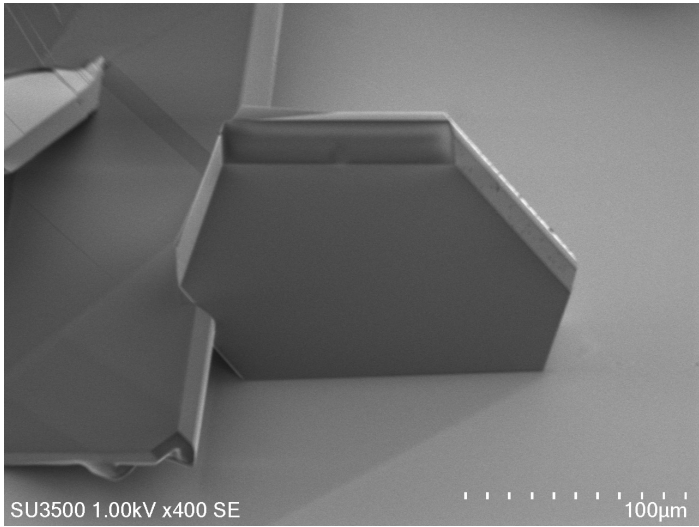

Tilt: 40°

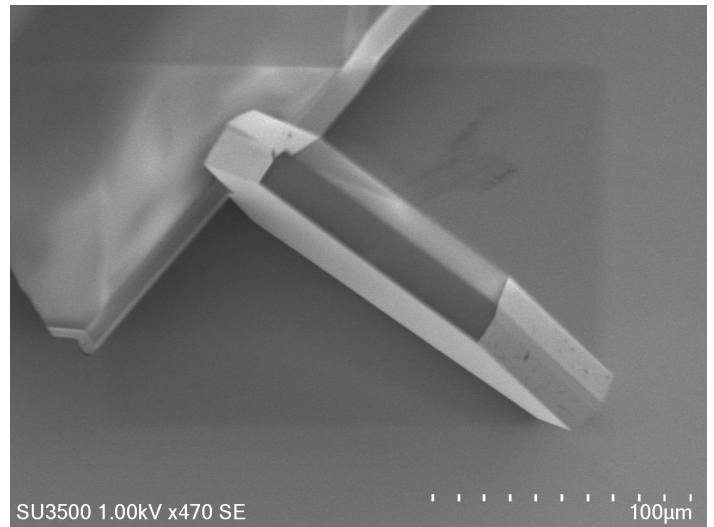

O%:  $2.51 \pm 0.71$

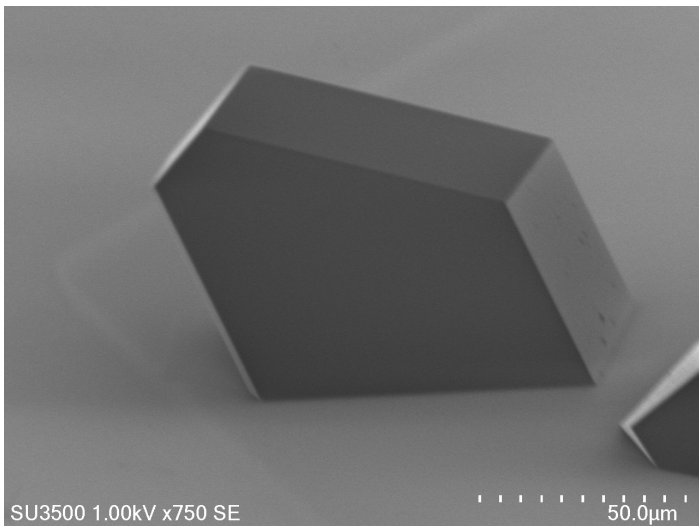

Tilt: 40°

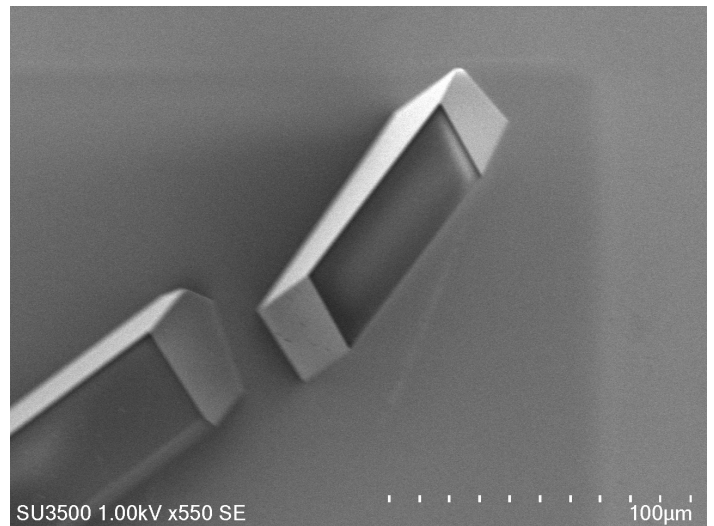

O%:  $2.51 \pm 0.85$

16h

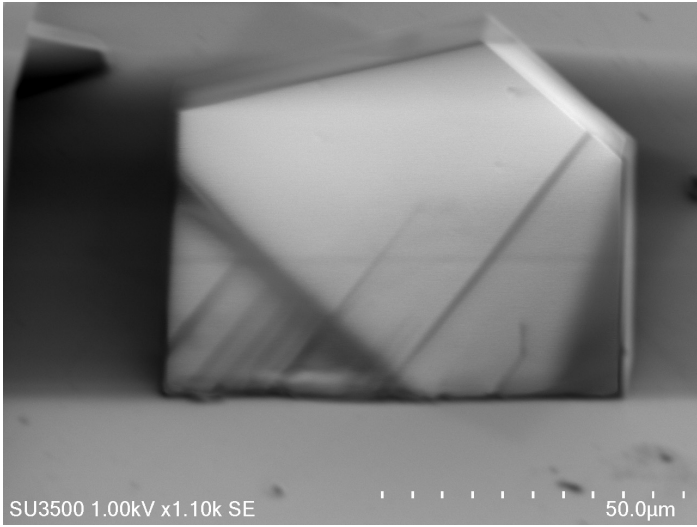

Tilt: 20°

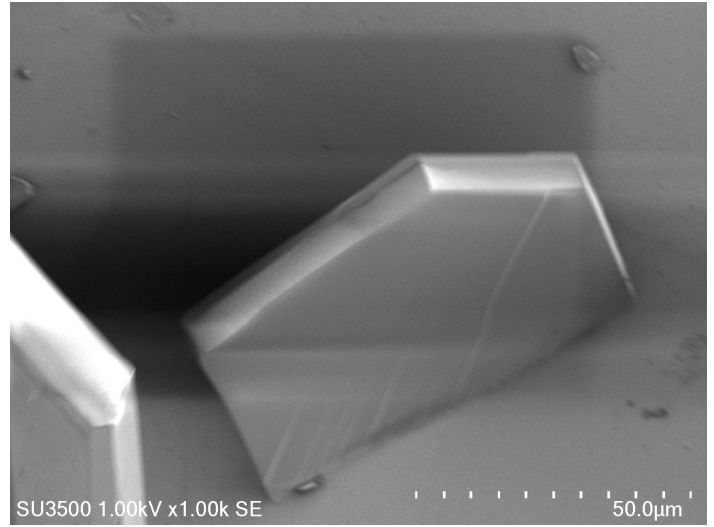

(201)

12h

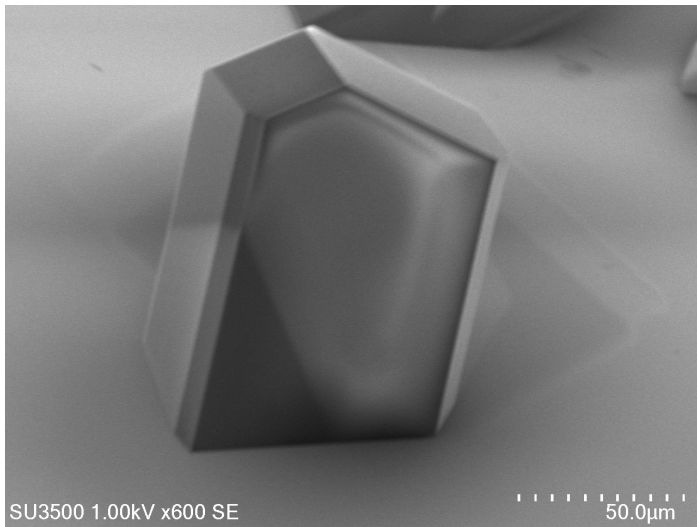

Tilt: 20°

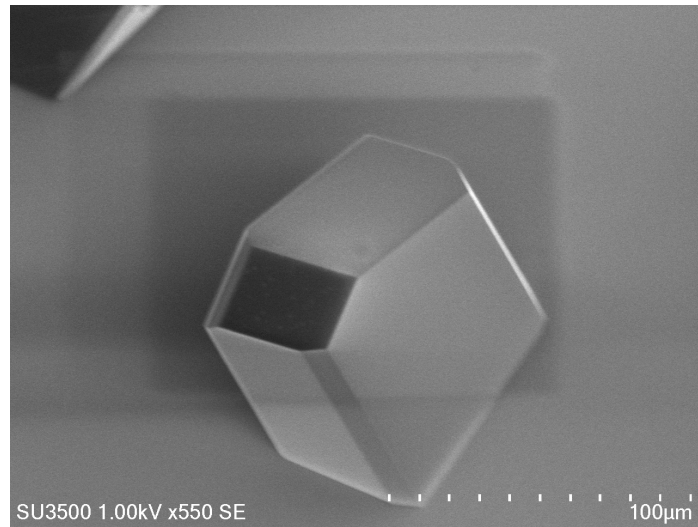

O%:  $1.80 \pm 0.74$

16h

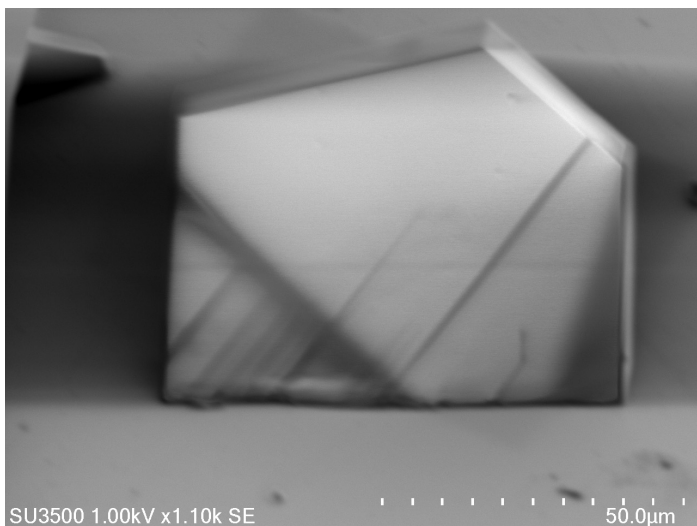

Tilt: 20°

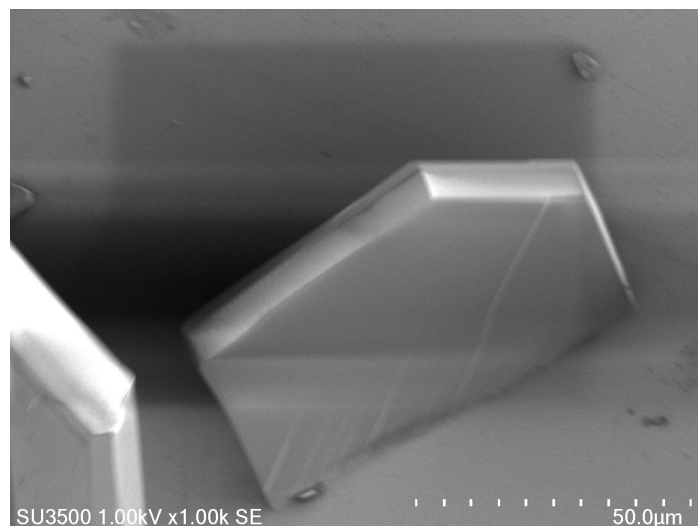

O%:  $4.18 \pm 1.04$

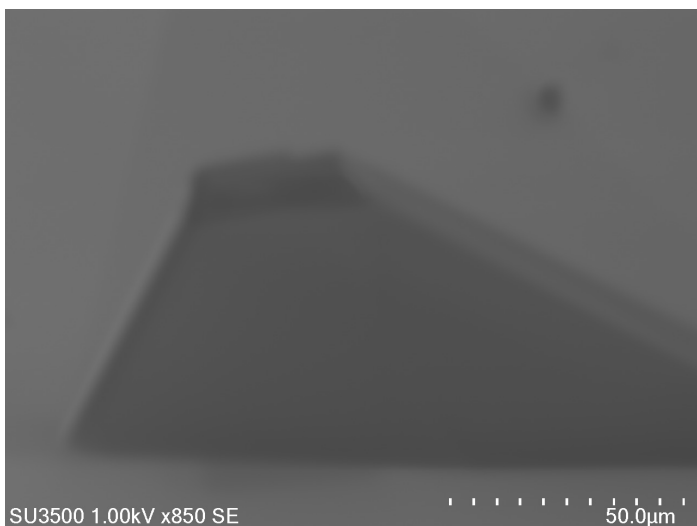

Tilt: 50°

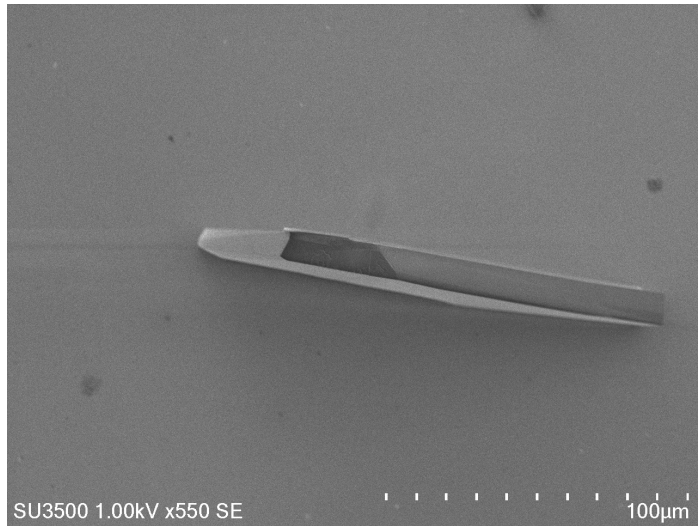

O%:  $2.26 \pm 1.06$

(201)

12h

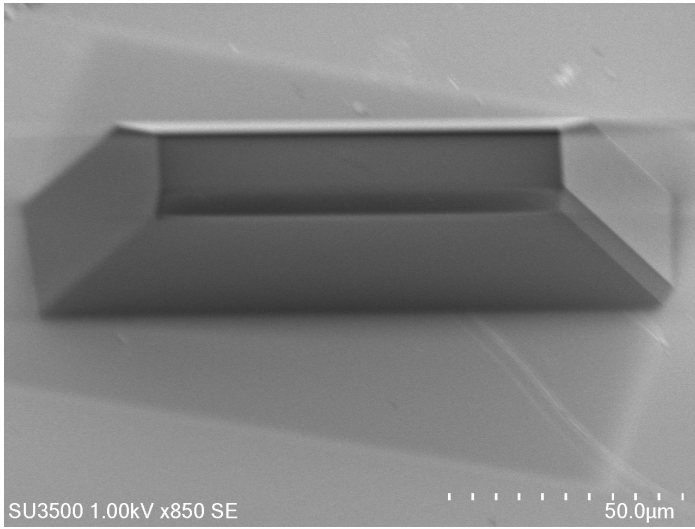

Tilt: 50°

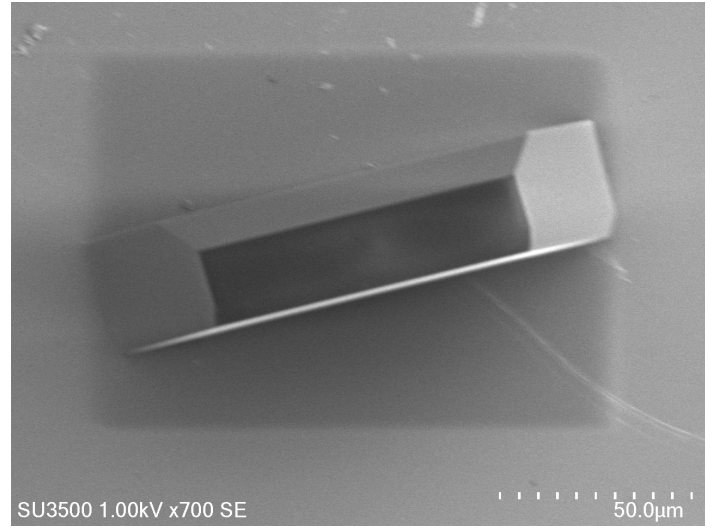

O%:  $2.47 \pm 0.62$

16h

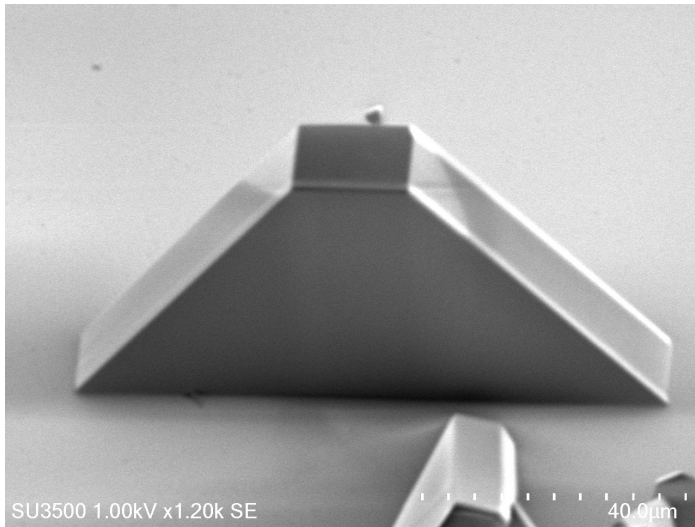

Tilt: 50°

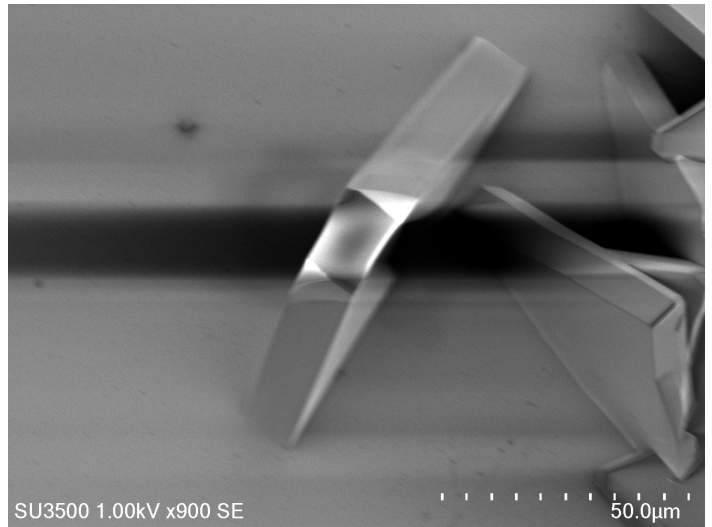

O%:  $3.93 \pm 1.46$

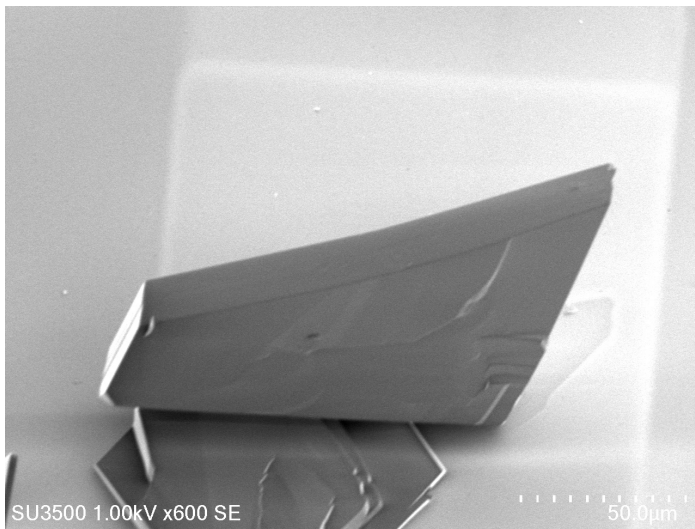

Tilt: 40°

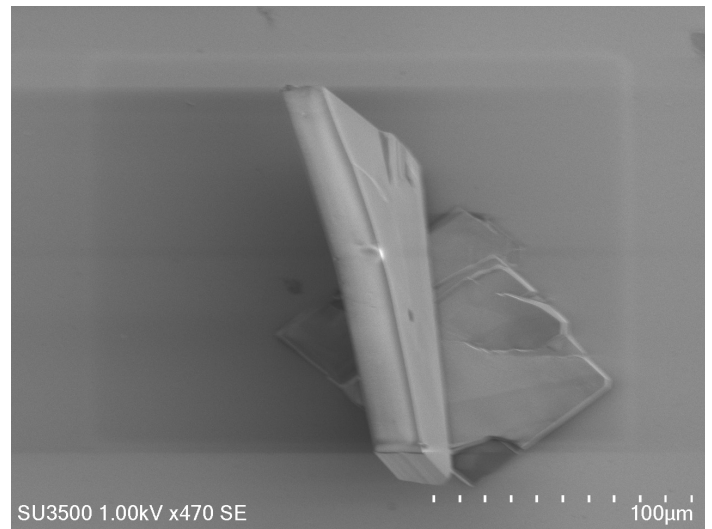

O%:  $3.96 \pm 1.13$
